# Supplementary material for: Prevalence and risk factors of hypertension among adults: A community based study in Addis Ababa, Ethiopia
Source: PubMed Central journal article supplement (PMC8016337; doi:10.1371/journal.pone.0248934), 2021-04-01
Supplement: pone.0248934.s002.pdf [file pone.0248934.s002.pdf]

QUESTIONNAIR ID /

|  |  |  |  |  |
|--|--|--|--|--|
|  |  |  |  |  |
|--|--|--|--|--|

**Annex I: English version questionnaires**

ADDIS ABABA UNIVERSITY  
COLLEGE OF HEALTH SCIENCES  
SCHOOL OF PUBLIC HEALTH

Questionnaire designed to study Epidemiology of Common Non Communicable Diseases (Hypertension, diabetes mellitus and Dyslipidemia) among Adults in Addis Ababa, Ethiopia: A Community Based Study

**Survey information**

| <b>Location and date</b>                    | <b>Response</b>                  | <b>Code</b> | <b>Skip to</b> |
|---------------------------------------------|----------------------------------|-------------|----------------|
| Cluster/ village ID                         | -----                            | I1          |                |
| Sub city name                               | .....                            | I2          |                |
| Cluster/ village name                       | -----                            | I3          |                |
| Interviewer Name and ID                     | -----                            | I4          |                |
| Date of completion of the questionnaires    | dd/mm/year----,-----,-----<br>-- | I5          |                |
| <b>Consent, interview language and name</b> | <b>Response</b>                  | <b>Code</b> |                |
| Consent has been read and obtained          | 1, yes 2, No if no , end         | I6          |                |
| Interview language                          | Amharic                          | I7          |                |
| Time of interview (24 hour clock)           | Hours-----, mins-----            | I8          |                |
| Participant code number                     | -----                            | I9          |                |
| Name of participant                         | -----                            | I10         |                |
| Contact phone number where possible         | -----                            | I11         |                |

**Step 1 Demographic information**

**CORE: Demographic information**

| <b>Question</b> | <b>Response</b> | <b>Code</b> | <b>Skip to</b> |
|-----------------|-----------------|-------------|----------------|
|-----------------|-----------------|-------------|----------------|

|  |  |  |  |  |
|--|--|--|--|--|
|  |  |  |  |  |
|--|--|--|--|--|

|                                                                                                  |                                                                                                                                                  |    |                 |
|--------------------------------------------------------------------------------------------------|--------------------------------------------------------------------------------------------------------------------------------------------------|----|-----------------|
| Sex                                                                                              | Male -----1<br>Female-----2                                                                                                                      | C1 |                 |
| What is your date of birth?                                                                      | dd/mm/yr<br>Don't know 77                                                                                                                        | C2 | If known→<br>C4 |
| How old are you?                                                                                 | ..... in years                                                                                                                                   | C3 |                 |
| Where was your birth place?                                                                      | Rural -----1<br>Urban-----2<br>I don't know-----3                                                                                                | C4 |                 |
| For how many years did you live in Addis Ababa?                                                  | ----- in months<br>-----in years<br>Born in Addis Ababa----1                                                                                     | C5 |                 |
| In total, how many years have you spent at school and in full-time study (excluding pre-school)? | ..... in years                                                                                                                                   | C6 |                 |
| <b>Expanded: Demographic information</b>                                                         |                                                                                                                                                  |    |                 |
| Have you ever attended school?                                                                   | Yes-----1<br>No -----2                                                                                                                           | C7 |                 |
| What is the highest level of school you attended:                                                | Primary (1-8)-----1<br>Secondary (9&10)----- 2<br>Preparatory(11 &12)--- -3<br>Technical/Vocational ---4<br>University ----- 5<br>Refused-----88 | C8 |                 |
| What is your Ethnic group?                                                                       | Amhara-----1<br>Oromo -----2<br>Gurage -----3<br>Tigre -----4<br>Other----- 5<br>Other, specify-----                                             | C9 |                 |

|  |  |  |  |  |
|--|--|--|--|--|
|  |  |  |  |  |
|--|--|--|--|--|

|                                                                                             |                                                                                                                                                                                                                                                                                                                                                                                                                                                                                                           |            |  |
|---------------------------------------------------------------------------------------------|-----------------------------------------------------------------------------------------------------------------------------------------------------------------------------------------------------------------------------------------------------------------------------------------------------------------------------------------------------------------------------------------------------------------------------------------------------------------------------------------------------------|------------|--|
| <p>What is your marital status?</p>                                                         | <p>Single never married-----1<br/>                 Currently married----- 2<br/>                 Separated-----3<br/>                 Divorced-----4<br/>                 Widowed-----5<br/>                 Refused -----88</p>                                                                                                                                                                                                                                                                          | <p>C10</p> |  |
| <p>What is your religion?</p>                                                               | <p>Orthodox -----1<br/>                 Muslim----- 2<br/>                 Protestant-----3<br/>                 Catholic-----4<br/>                 Other-----5<br/>                 Other, specify-----</p>                                                                                                                                                                                                                                                                                             | <p>C11</p> |  |
| <p>Which of the following best describes your main work status over the past 12 months?</p> | <p>Government employee-----1<br/>                 Non government employee-----2<br/>                 Self employed-----3<br/>                 Student-----4<br/>                 Housewife-----5<br/>                 Daily laborer-----6<br/>                 Merchant-----7<br/>                 Unemployed(able to work)----8<br/>                 Unemployed(unable to work)----9<br/>                 Retired----- 10<br/>                 Other-----11<br/>                 Other, specify-----</p> | <p>C12</p> |  |
| <p>How many people older than 18 years, including yourself, live in your household?</p>     | <p>Number of people.....</p>                                                                                                                                                                                                                                                                                                                                                                                                                                                                              | <p>C13</p> |  |
| <p>How many people live in your household including yourself?</p>                           | <p>Number of people-----</p>                                                                                                                                                                                                                                                                                                                                                                                                                                                                              | <p>C14</p> |  |

|  |  |  |  |  |
|--|--|--|--|--|
|  |  |  |  |  |
|--|--|--|--|--|

|                                                                                                |                                                                      |                 |                            |
|------------------------------------------------------------------------------------------------|----------------------------------------------------------------------|-----------------|----------------------------|
| Can you tell me the monthly income of the household?                                           | .....birr-----1<br>Didn't have any income -----2<br>Refused ----- 88 | C15             |                            |
| <b>Step 1 Behavioral measurements</b>                                                          |                                                                      |                 |                            |
| <b>CORE: Tobacco use</b>                                                                       |                                                                      |                 |                            |
| Now I am going to ask you some questions about tobacco use                                     |                                                                      |                 |                            |
| <b>Question</b>                                                                                | <b>Response</b>                                                      | <b>Code</b>     | <b>Skip to</b>             |
| Do you currently smoke any tobacco products, such as cigarettes, cigars, Gaya or pipes?        | Yes----- 1<br>No ----- 2                                             | T1              | If no, →<br>T8             |
| Do you currently smoke tobacco products daily?                                                 | Yes ----- 1<br>No----- 2                                             | T2              |                            |
| How old were you when you first started smoking?                                               | Age in years -----<br>Don't know----- 77                             | T3              | If known,<br>→<br>T5a/T5aw |
| Do you remember how long ago it was?<br>(Record only one, not all 3)                           | In years -----                                                       | T4a             | If known,<br>→<br>T5a/T5aw |
|                                                                                                | Or in months-----                                                    | T4b             | If known<br>→<br>T5a/T5aw  |
|                                                                                                | Or in weeks-----                                                     | T4c             | If known<br>→<br>T5a/T5aw  |
| On average, how many of the following products do you smoke each day/ week?<br>Don't know 7777 |                                                                      | Daily    Weekly |                            |
|                                                                                                | Manufactured cigarettes                                              |                 | T5a/Tsaw                   |
|                                                                                                | Hand rolled cigarettes                                               |                 | T5b/Tsbw                   |
|                                                                                                | Pipes full of tobacco                                                |                 | T5c/Tscw                   |

|  |  |  |  |  |
|--|--|--|--|--|
|  |  |  |  |  |
|--|--|--|--|--|

|                                                                                                                      | Cigars, cheroots, cigarillos             |  |    | T5d/Tsdw                                         |
|----------------------------------------------------------------------------------------------------------------------|------------------------------------------|--|----|--------------------------------------------------|
|                                                                                                                      | Number of Shisha sessions                |  |    | T5e/Tsew                                         |
|                                                                                                                      | Other                                    |  |    | T5f/Tsfw                                         |
|                                                                                                                      | If other, go to T5 other, else go to T6  |  |    |                                                  |
| During the past 12 months, have you tried to stop smoking?                                                           | Yes ----- 1                              |  |    | T6                                               |
|                                                                                                                      | No ----- 2                               |  |    |                                                  |
| During any visit to a doctor or other health worker in the past 12 months, were you advised to quit smoking tobacco? | Yes----- 1                               |  | T7 | If T2=yes,<br>→<br>T12,<br>if T2=No,<br>→ T9     |
|                                                                                                                      | No----- 2                                |  |    | If T2=yes,<br>→<br>T12,<br>if T2=No,<br>→<br>T9  |
|                                                                                                                      | No visit during the past 12 months---- 3 |  |    | If T2=yes,,<br>go to T12,<br>→<br>if T2=No,<br>→ |

|  |  |  |  |  |
|--|--|--|--|--|
|  |  |  |  |  |
|--|--|--|--|--|

|                                                                                              |                                                                                |             |                                          |
|----------------------------------------------------------------------------------------------|--------------------------------------------------------------------------------|-------------|------------------------------------------|
|                                                                                              |                                                                                |             | T9                                       |
| In the past, did you ever smoked any tobacco products?                                       | Yes----- 1<br>No ----- 2                                                       | T8          | If no,<br>➔<br>T 12                      |
| In the past, did you ever smoked daily?                                                      | Yes----- 1<br>No----- 2                                                        | T9          | If T1=yes,<br>➔<br>T12, else<br>➔<br>T10 |
|                                                                                              |                                                                                |             | If T1=yes,<br>➔<br>T12, else<br>➔<br>T10 |
| <b>EXPANDED: TOBACCO USE</b>                                                                 |                                                                                |             |                                          |
| <b>Question</b>                                                                              | <b>Response</b>                                                                | <b>Code</b> | <b>Skip to</b>                           |
| How old were you when you stopped smoking?                                                   | Age (years)-----<br>Don't know -----77                                         | T10         | If known,<br>➔<br>T12                    |
| How long ago did you stop smoking?<br>(Record only one answer)                               | Years ago -----<br>Or months ago-----<br>Or weeks age-----<br>Don't know ---77 | T11a        | If known,<br>➔<br>T12                    |
|                                                                                              |                                                                                | T11b        | If known,<br>➔<br>T12                    |
|                                                                                              |                                                                                | T11c        |                                          |
| Do you currently use any smokeless tobacco products such as (snuff, chewing tobacco, betel)? | Yes 1<br>No 2                                                                  | T 12        | If no,<br>➔<br>T15                       |

|  |  |  |  |  |
|--|--|--|--|--|
|  |  |  |  |  |
|--|--|--|--|--|

|                                                                                                           |                                                                             |       |        |                        |                                                     |
|-----------------------------------------------------------------------------------------------------------|-----------------------------------------------------------------------------|-------|--------|------------------------|-----------------------------------------------------|
| Do you currently use smokeless tobacco products daily?                                                    | Yes 1<br>No 2                                                               |       |        | T13                    | If no,<br>➔<br>T14aw                                |
| On average, how many times a day/ week you use (If less than daily, record weekly)<br>Don't know 777      |                                                                             | Daily | Weekly |                        |                                                     |
|                                                                                                           | Snuff, by mouth                                                             |       |        | T14a/<br>T14aw         |                                                     |
|                                                                                                           | Snuff, by nose                                                              |       |        | T14b/<br>T14bw         |                                                     |
|                                                                                                           | Chewing tobacco                                                             |       |        | T14c/<br>T14cw         |                                                     |
|                                                                                                           | Other <i>If Other, go to T14other, if T13=No, go to T16, else go to T17</i> |       |        | T14d/<br>T14dw         |                                                     |
|                                                                                                           | Other(please specify):                                                      |       |        | T14other/<br>T14otherw | <i>If T13=No,<br/>➔<br/>T16, else<br/>➔<br/>T17</i> |
| In the past, did you ever use smokeless tobacco products such as (snuff, chewing tobacco, or betel)?      | Yes----- 1<br>No -----2                                                     |       |        | T15                    | If no,<br>➔<br>T17                                  |
| In the past, did you ever use smokeless tobacco products such as [snuff, chewing tobacco, or betel]daily? | Yes ----- 1<br>No ----- 2                                                   |       |        | T16                    |                                                     |
| During the past 30 days, did someone smoke in your home? For never smoke only)                            | Yes----- 1<br>No----- 2                                                     |       |        | T17                    |                                                     |

|  |  |  |  |  |
|--|--|--|--|--|
|  |  |  |  |  |
|--|--|--|--|--|

|                                                                                                                                      |                                                                                                                 |      |                |
|--------------------------------------------------------------------------------------------------------------------------------------|-----------------------------------------------------------------------------------------------------------------|------|----------------|
| During the past 30 days, did someone smoke in closed areas in your workplace (in the building, in a work area or a specific office)? | Yes----- 1<br>No----- 2<br>Don't work in a closed area-- 3                                                      | T18  |                |
| Are you currently chew Khat?                                                                                                         | Yes ----- 1<br>No ----- 2<br>Refused----- 88                                                                    | T20  | If no →<br>T26 |
| During the last 30 days, on average how many days did you chew Khat?                                                                 | Daily -----1<br>Weekly -----2<br>Less than a month-----3<br>Monthly-----4<br>Other-----5<br>Other, specify----- | T21  |                |
| How many <b>Zurbas/"esire"</b> do you chew on <b>one</b> of those days?                                                              | ----- Zurbas/"esire"                                                                                            | T21a |                |
| How old were you when you first started chewing Khat?                                                                                | Age in years-----<br>I don't know-----77                                                                        | T22  |                |
| Do you remember how long ago it was, you have been started chewing Khat?                                                             | Weeks -----<br>Months -----<br>Years -----                                                                      | T23  |                |
| In the past, did you ever chew Khat? (For currently non Khat chewer)                                                                 | Yes-----1<br>No-----2<br>No response-----88                                                                     | T26  | If no →<br>A1  |



|  |  |  |  |  |
|--|--|--|--|--|
|  |  |  |  |  |
|--|--|--|--|--|

| How old were you when you stopped chewing Khat?                                                                                                   | Age in years-----                          | T27  |                  |
|---------------------------------------------------------------------------------------------------------------------------------------------------|--------------------------------------------|------|------------------|
| How long ago did you stop chewing Khat?                                                                                                           | Weeks -----<br>Months -----<br>Years ----- | T28  |                  |
| <b>CORE: Alcohol Consumption</b>                                                                                                                  |                                            |      |                  |
| The next questions ask about the consumption of alcohol                                                                                           |                                            |      |                  |
| Question                                                                                                                                          | Response                                   | Code | Skip to          |
| Have you ever consumed any alcohol such as Beer, Wine, Spirits, Whisky, etc.?                                                                     | Yes 1<br>No 2                              | A1   | If no, →<br>A16  |
| Have you consumed any alcohol within the past 12 months?                                                                                          | Yes 1<br>No 2                              | A2   | If no, →<br>A4   |
| Have you stopped drinking due to health reasons, such as a negative impact on your health or on the advice of your doctor or other health worker? | Yes 1<br>No 2                              | A3   | If yes, →<br>A16 |
|                                                                                                                                                   |                                            |      | If no, →<br>A16  |
| During the past 12 months, <b>how frequently</b> have you had at least one standard alcoholic drink?                                              | Daily 1                                    | A4   |                  |
|                                                                                                                                                   | 5-6 days per week 2                        |      |                  |
|                                                                                                                                                   | 3-4 days per week 3                        |      |                  |
|                                                                                                                                                   | 1-2 days per week 4                        |      |                  |
|                                                                                                                                                   | 1-3 days per month 5                       |      |                  |
|                                                                                                                                                   | Less than once a month 6                   |      |                  |
| Have you consumed any alcohol within the <b>past 30 days</b> ?                                                                                    | Yes 1<br>No 2                              | A5   | If no, →<br>A13  |
| During the past 30 days, on how many <b>occasions</b> did you have at least one standard alcoholic drink?                                         | Number -----<br>Don't know -----77         | A6   |                  |

|  |  |  |  |  |
|--|--|--|--|--|
|  |  |  |  |  |
|--|--|--|--|--|

|                                                                                                                                                                                                                                                                                                                                                                                                                |                                             |             |             |
|----------------------------------------------------------------------------------------------------------------------------------------------------------------------------------------------------------------------------------------------------------------------------------------------------------------------------------------------------------------------------------------------------------------|---------------------------------------------|-------------|-------------|
| During the past 30 days, when you drank alcohol, how many <b>standard drinks on average</b> did you have during one drinking occasion?                                                                                                                                                                                                                                                                         | Number -----<br>Don't know -----77          | A7          |             |
| During the past 30 days, what was the <b>largest number</b> of standard drinks you had on a single occasion, counting all types of alcoholic drinks together?                                                                                                                                                                                                                                                  | Largest number-----<br>Don't know -----77   | A8          |             |
| During the past 30 days, how many times did you have <b>six or more</b> standard drinks in a single drinking occasion?                                                                                                                                                                                                                                                                                         | Number of times -----<br>Don't know -----77 | A9          |             |
| For men: five or more                                                                                                                                                                                                                                                                                                                                                                                          | Number of times-----<br>Don't know -----77  | A9a         |             |
| For women: four or more                                                                                                                                                                                                                                                                                                                                                                                        | Number of times -----<br>Don't know -----77 | A9b         |             |
| During each of the <b>past 7 days</b> , how many standard drinks did you have each day?<br><i>Don't Know 77</i>                                                                                                                                                                                                                                                                                                | Monday                                      | A11a        |             |
|                                                                                                                                                                                                                                                                                                                                                                                                                | Tuesday                                     | A11b        |             |
|                                                                                                                                                                                                                                                                                                                                                                                                                | Wednesday                                   | A11c        |             |
|                                                                                                                                                                                                                                                                                                                                                                                                                | Thursday                                    | A11d        |             |
|                                                                                                                                                                                                                                                                                                                                                                                                                | Friday                                      | A11e        |             |
|                                                                                                                                                                                                                                                                                                                                                                                                                | Saturday                                    | A11f        |             |
|                                                                                                                                                                                                                                                                                                                                                                                                                | Sunday                                      | A11g        |             |
| I have just asked you about your consumption of alcohol during the past 7 days. The questions were about alcohol in general, while the next questions refer to your consumption of homebrewed alcohol, alcohol brought over the border/from another country, any alcohol not intended for drinking or other untaxed alcohol. Please only think about these types of alcohol when answering the next questions. |                                             |             |             |
| <b>Question</b>                                                                                                                                                                                                                                                                                                                                                                                                | <b>Response</b>                             | <b>Code</b> | <b>Skip</b> |

|  |  |  |  |  |
|--|--|--|--|--|
|  |  |  |  |  |
|--|--|--|--|--|

|                                                                                                                                                                                                                                                                           |                                                                                         |      |                 |
|---------------------------------------------------------------------------------------------------------------------------------------------------------------------------------------------------------------------------------------------------------------------------|-----------------------------------------------------------------------------------------|------|-----------------|
| During the <b>past 7 days</b> , did you consume any <b>homebrewed</b> alcohol; any alcohol <b>brought over the border/from another country</b> , any alcohol <b>not intended for drinking</b> or other <b>untaxed</b> alcohol?(like Tella, Teji, Yehabesha Areki, ...etc) | Yes 1<br>No 2                                                                           | A12  | If no, →<br>A14 |
| On average, <b>how many standard drinks</b> of the following did you consume <b>during the past 7 days</b> ?<br>Don't know 77                                                                                                                                             | Homebrewed spirits, e.g. moonshine                                                      | A13a |                 |
|                                                                                                                                                                                                                                                                           | Homebrewed beer or wine, e.g. Tella, Teji or Araki                                      | A13b |                 |
|                                                                                                                                                                                                                                                                           | Alcohol brought over the border/from another country                                    | A13c |                 |
|                                                                                                                                                                                                                                                                           | Alcohol not intended for drinking, e.g. alcohol-based medicines, perfumes, after shaves | A13d |                 |
|                                                                                                                                                                                                                                                                           | Other untaxed alcohol in the country                                                    | A13e |                 |
| <b>EXPANDED: Alcohol Consumption</b>                                                                                                                                                                                                                                      |                                                                                         |      |                 |
| During the <b>past 12 months</b> , how often have you found that you were not able to stop drinking once you had started?                                                                                                                                                 | Daily or almost daily 1                                                                 | A14  |                 |
|                                                                                                                                                                                                                                                                           | Weekly 2                                                                                |      |                 |
|                                                                                                                                                                                                                                                                           | Monthly 3                                                                               |      |                 |
|                                                                                                                                                                                                                                                                           | Less than monthly 4                                                                     |      |                 |
|                                                                                                                                                                                                                                                                           | Never 5                                                                                 |      |                 |
| During the <b>past 12 months</b> , how often have you failed to do what was normally expected from you because of drinking?                                                                                                                                               | Daily or almost daily 1                                                                 | A15  |                 |
|                                                                                                                                                                                                                                                                           | Weekly 2                                                                                |      |                 |
|                                                                                                                                                                                                                                                                           | Monthly 3                                                                               |      |                 |
|                                                                                                                                                                                                                                                                           | Less than monthly 4                                                                     |      |                 |
|                                                                                                                                                                                                                                                                           | Never 5                                                                                 |      |                 |
| During the <b>past 12 months</b> , how often have you                                                                                                                                                                                                                     | Daily or almost daily 1                                                                 | A16  |                 |

|  |  |  |  |  |
|--|--|--|--|--|
|  |  |  |  |  |
|--|--|--|--|--|

|                                                                                           |                   |   |  |  |
|-------------------------------------------------------------------------------------------|-------------------|---|--|--|
| needed a first drink in the morning to get yourself going after a heavy drinking session? | Weekly            | 2 |  |  |
|                                                                                           | Monthly           | 3 |  |  |
|                                                                                           | Less than monthly | 4 |  |  |
|                                                                                           | Never             | 5 |  |  |

**CORE: Diet**

The next questions ask about the fruits and vegetables that you usually eat. I have a nutrition card here that shows you some examples of local fruits and vegetables. Each picture represents the size of a serving. As you answer these questions, please think of a typical week in the last year.

| Question                                                                                                                                                          | Response                                     | Code | Skip to               |
|-------------------------------------------------------------------------------------------------------------------------------------------------------------------|----------------------------------------------|------|-----------------------|
| In a typical week, on how many days do you <b>eat fruit</b> ?                                                                                                     | Number of days.....<br>Don't Know ----77     | D1   | if Zero days, →<br>D3 |
| How many <b>servings</b> of fruit do you eat on <b>one</b> of those days?(serving in this case refers to slice or one full fruit e.g. orange, banana, mango, ...) | Number of servings-----<br>Don't Know-----77 | D2   |                       |
| In a typical week, on how many days do you <b>eat vegetables</b> ?                                                                                                | Number of days -----<br>Don't Know -----77   | D3   |                       |
| How many <b>servings</b> of vegetables do you eat on one of those days? (serving in this case refers to cups or "Chilfa") of vegetable stews)                     | Number of days -----<br>Don't Know -----77   | D4   |                       |

**Dietary salt**

With the next questions, we would like to learn more about salt in your diet. Dietary salt includes ordinary table salt, unrefined salt such as sea salt, iodized salt, salty stock cubes and powders, and salty sauces such as soya sauce, fish sauce, tomato sauce, or Magi Mereq. The following questions are on adding salt to the food right before you eat it, on how food is prepared in your home, on eating processed foods that are high in salt, and questions on controlling your salt intake. Please answer the questions, even if you consider yourself to eat a diet low in salt.

|                                                            |          |    |  |
|------------------------------------------------------------|----------|----|--|
| How often do you <b>add salt or a salty sauce, such as</b> | Always 1 | D7 |  |
|------------------------------------------------------------|----------|----|--|

|  |  |  |  |  |
|--|--|--|--|--|
|  |  |  |  |  |
|--|--|--|--|--|

|                                                                                                                                                                                                                                                                                                                                              |                         |     |  |
|----------------------------------------------------------------------------------------------------------------------------------------------------------------------------------------------------------------------------------------------------------------------------------------------------------------------------------------------|-------------------------|-----|--|
| <b>soya sauce</b> to your food right before you eat it or as you are eating it? (Select only one)                                                                                                                                                                                                                                            | Often 2                 |     |  |
|                                                                                                                                                                                                                                                                                                                                              | Sometimes 3             |     |  |
|                                                                                                                                                                                                                                                                                                                                              | Rarely 4                |     |  |
|                                                                                                                                                                                                                                                                                                                                              | Never 5                 |     |  |
|                                                                                                                                                                                                                                                                                                                                              | Don't know 77           |     |  |
| How often is <b>salt, salty seasoning or a salty sauce added</b> in cooking or preparing foods in your household?                                                                                                                                                                                                                            | 1 Always                | D8  |  |
|                                                                                                                                                                                                                                                                                                                                              | 2 Often                 |     |  |
|                                                                                                                                                                                                                                                                                                                                              | 3 Sometimes             |     |  |
|                                                                                                                                                                                                                                                                                                                                              | 4 Rarely                |     |  |
|                                                                                                                                                                                                                                                                                                                                              | 5 Never                 |     |  |
|                                                                                                                                                                                                                                                                                                                                              | Don't know---77         |     |  |
| How often do you eat <b>processed food high in salt</b> ? By processed food high in salt, I mean foods that have been altered from their natural state, such as packaged salty snacks, canned salty food, including pickles and preserves, salty food prepared at a fast food restaurant, cheese, bacon and processed meat [ <i>chips</i> ]. | 1 Always                | D9  |  |
|                                                                                                                                                                                                                                                                                                                                              | 2 Often                 |     |  |
|                                                                                                                                                                                                                                                                                                                                              | 3 Sometimes             |     |  |
|                                                                                                                                                                                                                                                                                                                                              | 4 Rarely                |     |  |
|                                                                                                                                                                                                                                                                                                                                              | 5 Never                 |     |  |
|                                                                                                                                                                                                                                                                                                                                              | Don't know---77         |     |  |
| <b>How much salt or salty sauce</b> do you think you consume?                                                                                                                                                                                                                                                                                | 1 Far too much          | D10 |  |
|                                                                                                                                                                                                                                                                                                                                              | 2 Too much              |     |  |
|                                                                                                                                                                                                                                                                                                                                              | 3 Just the right amount |     |  |
|                                                                                                                                                                                                                                                                                                                                              | 4 Too little            |     |  |
|                                                                                                                                                                                                                                                                                                                                              | 5 Far too little        |     |  |
|                                                                                                                                                                                                                                                                                                                                              | Don't know---77         |     |  |
| <b>The next questions ask about the oil or fat that is most often used for meal preparation in your household, and about meals that you eat outside a home.</b>                                                                                                                                                                              |                         |     |  |

|  |  |  |  |  |
|--|--|--|--|--|
|  |  |  |  |  |
|--|--|--|--|--|

|                                                                                                                                                                                                                                                                                                                                                                                                                                                                                                                                                                                                                                                                                                                                                                                        |                                                                                                                                                                                                                                                                             |             |                             |
|----------------------------------------------------------------------------------------------------------------------------------------------------------------------------------------------------------------------------------------------------------------------------------------------------------------------------------------------------------------------------------------------------------------------------------------------------------------------------------------------------------------------------------------------------------------------------------------------------------------------------------------------------------------------------------------------------------------------------------------------------------------------------------------|-----------------------------------------------------------------------------------------------------------------------------------------------------------------------------------------------------------------------------------------------------------------------------|-------------|-----------------------------|
| What type of <b>oil or fat is most often</b> used for meal preparation in your household?                                                                                                                                                                                                                                                                                                                                                                                                                                                                                                                                                                                                                                                                                              | 1) Liquid vegetable oil<br>2) Solid vegetable oil(e.g. Viking, Chief...)<br>3) Sesame/Nug oil/Sun flower<br>4) Sheno Lega, Shadi Lega<br>5) Natural butter<br>6) Margarine<br>7) Other<br>8) Other, specify-----<br>9) None in particular<br>10) None used<br>77)Don't know | D15         | if other,<br>➔<br>D15 other |
|                                                                                                                                                                                                                                                                                                                                                                                                                                                                                                                                                                                                                                                                                                                                                                                        | Other -----                                                                                                                                                                                                                                                                 | D15 other   |                             |
| On average, how many meals per week do you eat that were not prepared at a home? By meal, I mean breakfast, lunch and dinner.                                                                                                                                                                                                                                                                                                                                                                                                                                                                                                                                                                                                                                                          | Number<br>Don't know 77                                                                                                                                                                                                                                                     | D16         |                             |
| <b>CORE: Physical Activity</b>                                                                                                                                                                                                                                                                                                                                                                                                                                                                                                                                                                                                                                                                                                                                                         |                                                                                                                                                                                                                                                                             |             |                             |
| Next I am going to ask you about the time you spend doing different types of physical activity in a typical week. Please answer these questions, even if you do not consider yourself to be a physically active person. Think first about the time you spend doing work. Think of work as the things that you have to do such as paid or unpaid work, study/training, household chores, harvesting food/crops, fishing or hunting for food, seeking employment. In answering the following questions 'vigorous-intensity activities' are activities that require hard physical effort and cause large increases in breathing or heart rate, 'moderate-intensity activities' are activities that require moderate physical effort and cause small increases in breathing or heart rate. |                                                                                                                                                                                                                                                                             |             |                             |
| <b>Question</b>                                                                                                                                                                                                                                                                                                                                                                                                                                                                                                                                                                                                                                                                                                                                                                        | <b>Response</b>                                                                                                                                                                                                                                                             | <b>Code</b> | <b>Skip to</b>              |
| <b>Work</b>                                                                                                                                                                                                                                                                                                                                                                                                                                                                                                                                                                                                                                                                                                                                                                            |                                                                                                                                                                                                                                                                             |             |                             |

|  |  |  |  |  |
|--|--|--|--|--|
|  |  |  |  |  |
|--|--|--|--|--|

|                                                                                                                                                                                                                                                           |                              |             |                 |
|-----------------------------------------------------------------------------------------------------------------------------------------------------------------------------------------------------------------------------------------------------------|------------------------------|-------------|-----------------|
| Does your work involve vigorous-intensity activity that causes large increases in breathing or heart rate like [carrying or lifting heavy loads, digging or construction work] for at least 10 minutes continuously?                                      | Yes 1<br>No 2                | P1          | if no, →<br>P4  |
| In a typical week, on how many days do you do vigorous-intensity activities as part of your work?                                                                                                                                                         | Number of days -----         | P2          |                 |
| How much time do you spend doing vigorous-intensity activities at work on a typical day?                                                                                                                                                                  | Hours:-- minutes---          | P3<br>(a-b) |                 |
| Does your work involve moderate-intensity activity, that causes small increases in breathing or heart rate such as brisk walking [or carrying light loads] for at least 10 minutes continuously?                                                          | Yes 1<br>No 2                | P4          | if no, →<br>P7  |
| In a typical week, on how many days do you do moderate-intensity activities as part of your work?                                                                                                                                                         | Number of days               | P5          |                 |
| How much time do you spend doing moderate-intensity activities at work on a typical day?                                                                                                                                                                  | Hours:-- minutes---          | P6<br>(a-b) |                 |
| <b>Travel to and from places</b>                                                                                                                                                                                                                          |                              |             |                 |
| The next questions exclude the physical activities at work that you have already mentioned. Now I would like to ask you about the usual way you travel to and from places. For example to work, for shopping, to market, to place of worship. [to church] |                              |             |                 |
| Do you walk or use a bicycle ( <i>pedal cycle</i> ) for at least 10 minutes continuously to get to and from places?                                                                                                                                       | Yes 1<br>No 2                | P7          | if no, →<br>P10 |
| In a typical week, on how many days do you walk or bicycle for at least 10 minutes continuously to get to and from places?                                                                                                                                | Number of days per week----- | P8          |                 |
| How much time do you spend walking or bicycling for travel on a typical day?                                                                                                                                                                              | Hours:----- minutes---       | P9 (a-b)    |                 |
| <b>Recreational activities</b>                                                                                                                                                                                                                            |                              |             |                 |
| The next questions exclude the work and transport activities that you have already mentioned. Now I would like to ask you about                                                                                                                           |                              |             |                 |

|  |  |  |  |  |
|--|--|--|--|--|
|  |  |  |  |  |
|--|--|--|--|--|

|                                                                                                                                                                                                                                                                                                          |                       |              |                 |
|----------------------------------------------------------------------------------------------------------------------------------------------------------------------------------------------------------------------------------------------------------------------------------------------------------|-----------------------|--------------|-----------------|
| sports, fitness and recreational activities (leisure), [Jim].                                                                                                                                                                                                                                            |                       |              |                 |
| Do you do any vigorous-intensity sports, fitness or recreational ( <i>leisure</i> ) activities that cause large increases in breathing or heart rate like [running or football, aerobics, fast bicycling, fast simming ] for at least 10 minutes continuously? [Jim, tennis...]                          | Yes 1<br>No 2         | P12          | if no, →<br>P15 |
| In a typical week, on how many days do you do vigorous-intensity sports, fitness or recreational ( <i>leisure</i> ) activities?                                                                                                                                                                          | Number of days        | P13          |                 |
| How much time do you spend doing vigorous-intensity sports, fitness or recreational activities on a typical day?                                                                                                                                                                                         | Hours:---- minutes--- | P14(a-b)     |                 |
| Do you do any moderate-intensity sports, fitness or recreational ( <i>leisure</i> ) activities that cause a small increase in breathing or heart rate such as brisk walking, [cycling, swimming, and volleyball] for at least 10 minutes continuously?                                                   | Yes 1<br>No 2         | P15          | if no, →<br>P18 |
| In a typical week, on how many days do you do moderate-intensity sports, fitness or recreational ( <i>leisure</i> ) activities?                                                                                                                                                                          | Number of days        | P16          |                 |
| How much time do you spend doing moderate-intensity sports, fitness or recreational ( <i>leisure</i> ) activities in a typical day?                                                                                                                                                                      | Hours:-- minutes---   | P17<br>(a-b) |                 |
| <b>EXPANDED: Physical Activity</b>                                                                                                                                                                                                                                                                       |                       |              |                 |
| <b>Sedentary behavior/ Time spent sitting</b>                                                                                                                                                                                                                                                            |                       |              |                 |
| The following question is about sitting or reclining at work, at home, getting to and from places, or with friends, including time spent sitting at a desk, sitting with friends, traveling in a car, bus, train, reading, playing cards or watching television, but do not include time spent sleeping. |                       |              |                 |



|  |  |  |  |  |
|--|--|--|--|--|
|  |  |  |  |  |
|--|--|--|--|--|

|                                                                                                                                       |                                                                                                    |              |                 |
|---------------------------------------------------------------------------------------------------------------------------------------|----------------------------------------------------------------------------------------------------|--------------|-----------------|
| How much time do you usually spend sitting or reclining on a typical day?                                                             | Hours:-- minutes---                                                                                | P18<br>(a-b) |                 |
| <b>Other life style questions</b>                                                                                                     |                                                                                                    |              |                 |
| <b>CORE: History of Raised Blood Pressure</b>                                                                                         |                                                                                                    |              |                 |
| Have you ever had your blood pressure measured by a doctor or other health worker?                                                    | Yes 1<br>No 2                                                                                      | H15          | if no, →<br>H24 |
| Have you ever been told by a doctor or other health worker that you have raised blood pressure or hypertension?                       | Yes 1<br>No 2                                                                                      | H16          | if no, →<br>H24 |
| Have you been told in the past 12 months?                                                                                             | Yes 1<br>No 2                                                                                      | H18          |                 |
| In the past two weeks, have you taken any drugs (medication) for raised blood pressure prescribed by a doctor or other health worker? | Yes 1<br>No 2                                                                                      | H19          |                 |
| Have you ever seen a traditional healer for raised blood pressure or hypertension?                                                    | Yes 1<br>No 2                                                                                      | H22          |                 |
| Are you currently taking any herbal or traditional remedy for your raised blood pressure?                                             | Yes 1<br>No 2                                                                                      | H23          |                 |
| Is anyone in your family hypertensive?                                                                                                | Mother-----3<br>Brothers and sisters-----4<br>Children -----5<br>No one-----6<br>Don't know-----77 | H24          |                 |
| <b>CORE: History of Diabetes</b>                                                                                                      |                                                                                                    |              |                 |
| <b>Question</b>                                                                                                                       | <b>Response</b>                                                                                    | <b>Code</b>  | <b>Skip</b>     |
| Have you ever had your blood sugar measured by a doctor or other health worker?                                                       | Yes 1<br>No 2<br>Don't know-----88                                                                 | H36          | if no, →<br>H43 |

|  |  |  |  |  |
|--|--|--|--|--|
|  |  |  |  |  |
|--|--|--|--|--|

|                                                                                                                          |                                                                                                                                     |                 |                 |
|--------------------------------------------------------------------------------------------------------------------------|-------------------------------------------------------------------------------------------------------------------------------------|-----------------|-----------------|
| Have you ever been told by a doctor or other health worker that you have raised blood sugar or diabetes?                 | Yes 1<br>No 2                                                                                                                       | H37a            | if no, →<br>H43 |
| Have you been told in the past 12 months?                                                                                | Yes 1<br>No 2                                                                                                                       | H37b            |                 |
| In the past two weeks, have you taken any drugs (medication) for diabetes prescribed by a doctor or other health worker? | Yes 1<br>No 2                                                                                                                       | H38             |                 |
| Are you currently taking insulin for diabetes prescribed by a doctor or other health worker?                             | Yes 1<br>No 2                                                                                                                       | H39             |                 |
|                                                                                                                          | Other specify-----                                                                                                                  | H40 other       |                 |
| Have you ever seen a traditional healer for diabetes or raised blood sugar?                                              | Yes 1<br>No 2                                                                                                                       | H41             |                 |
| Are you currently taking any herbal or traditional remedy for your diabetes?                                             | Yes 1<br>No 2                                                                                                                       | H42             |                 |
| Is anyone in your family diabetes?                                                                                       | Parents-----1<br>Father-----2<br>Mother-----3<br>Brothers and sisters-----4<br>Children -----5<br>No one-----6<br>Don't know-----77 | H43             |                 |
| <b>CORE: History of Raised Total Cholesterol</b>                                                                         |                                                                                                                                     |                 |                 |
| <b>Question</b>                                                                                                          |                                                                                                                                     | <b>Response</b> | <b>Code</b>     |
| Have you ever had your cholesterol (fat levels in your blood) measured by a doctor or other health worker?               | Yes 1<br>No 2<br>Don't know-----88                                                                                                  | H46             | if no, →<br>H51 |
| Have you ever been told by a doctor or other health worker that you have raised cholesterol?                             | Yes 1<br>No 2                                                                                                                       | H47a            | if no, →<br>H51 |
| Have you been told in the past 12 months?                                                                                | Yes 1                                                                                                                               | H47b            |                 |

|  |  |  |  |  |
|--|--|--|--|--|
|  |  |  |  |  |
|--|--|--|--|--|

|                                                                                                                                                   |                                                                                                                                     |     |  |
|---------------------------------------------------------------------------------------------------------------------------------------------------|-------------------------------------------------------------------------------------------------------------------------------------|-----|--|
|                                                                                                                                                   | No 2                                                                                                                                |     |  |
| In the past two weeks, have you taken any oral treatment (medication) for raised total cholesterol prescribed by a doctor or other health worker? | Yes 1<br>No 2                                                                                                                       | H48 |  |
| Have you ever seen a traditional healer for raised cholesterol?                                                                                   | Yes 1<br>No 2                                                                                                                       | H49 |  |
| Are you currently taking any herbal or traditional remedy for your raised cholesterol?                                                            | Yes 1<br>No 2                                                                                                                       | H50 |  |
| Is anyone in your family dyslipidemic?                                                                                                            | Parents-----1<br>Father-----2<br>Mother-----3<br>Brothers and sisters-----4<br>Children -----5<br>No one-----6<br>Don't know-----77 | H51 |  |

**Step 2 Physical Measurements**

**CORE: Blood Pressure**

| Question                     | Response                                      | Code       | Skip |
|------------------------------|-----------------------------------------------|------------|------|
| Interviewer ID               | -----                                         | M1         |      |
| Device ID for blood pressure | -----                                         | M2         |      |
| Cuff size used               | 1) Small<br>2) Medium<br>3) Large             | M3         |      |
| Reading 1                    | Systolic (mmHg)-----<br>Diastolic (mmHg)----- | M4a<br>M4b |      |
| Reading 2                    | Systolic (mmHg)-----<br>Diastolic (mmHg)----- | M5a<br>M5b |      |
| Reading 3                    | Systolic (mmHg)-----<br>Diastolic (mmHg)----- | M6a<br>M6b |      |

|  |  |  |  |  |
|--|--|--|--|--|
|  |  |  |  |  |
|--|--|--|--|--|

|                                                                                                                                                   |                              |             |             |
|---------------------------------------------------------------------------------------------------------------------------------------------------|------------------------------|-------------|-------------|
| During the past two weeks, have you been treated for raised blood pressure with drugs (medication) prescribed by a doctor or other health worker? | Yes 1<br>No 2                | M7          |             |
| <b>CORE: Height and Weight</b>                                                                                                                    |                              |             |             |
| Interviewer ID                                                                                                                                    | -----                        | M8          |             |
| Device IDs for height and weight                                                                                                                  | Height -----<br>Weight ----- | M9a<br>M9b  |             |
| Height                                                                                                                                            | in Centimeters (cm)-----     | M10         |             |
| Weight<br><i>If too large for scale 666.6</i>                                                                                                     | in Kilograms (kg)-----       | M11         |             |
| <b>CORE: Waist</b>                                                                                                                                |                              |             |             |
| Device ID for waist                                                                                                                               | -----                        | M12         |             |
| Waist circumference                                                                                                                               | in Centimetres (cm)          | M13         |             |
| <b>EXPANDED: Hip Circumference and Heart Rate</b>                                                                                                 |                              |             |             |
| Hip circumference                                                                                                                                 | in Centimeters (cm)          | M14         |             |
| Heart Rate                                                                                                                                        |                              |             |             |
| Reading 1                                                                                                                                         | Beats per minute-----        | M15a        |             |
| Reading 2                                                                                                                                         | Beats per minute-----        | M15b        |             |
| Reading 3                                                                                                                                         | Beats per minute-----        | M15c        |             |
| <b>Step 3 Biochemical Measurements</b>                                                                                                            |                              |             |             |
| <b>CORE: Blood Glucose</b>                                                                                                                        |                              |             |             |
| <b>Question</b>                                                                                                                                   | <b>Response</b>              | <b>Code</b> | <b>Skip</b> |
| During the past 12 hours have you had anything to eat or drink, other than water?                                                                 | Yes 1<br>No 2                | B1          |             |
| Technician ID                                                                                                                                     | -----                        | B2          |             |
| Device ID                                                                                                                                         | -----                        | B3          |             |
| Time of day blood specimen taken (24 hour clock)                                                                                                  | Hours-----, mins-----        | B4          |             |
| Fasting blood glucose                                                                                                                             | <i>mmol/l</i> -----          | B5          |             |

|  |  |  |  |  |
|--|--|--|--|--|
|  |  |  |  |  |
|--|--|--|--|--|

|                                                                                                                                                  |                                         |             |             |
|--------------------------------------------------------------------------------------------------------------------------------------------------|-----------------------------------------|-------------|-------------|
| <i>[CHOOSE ACCORDINGLY: mmol/l OR mg/dl]</i>                                                                                                     | <i>mg/dl-----</i>                       |             |             |
| Today, have you taken insulin or other drugs (medication) that have been prescribed by a doctor or other health worker for raised blood glucose? | Yes 1<br>No 2                           | B6          |             |
| <b>CORE: Blood Lipids</b>                                                                                                                        |                                         |             |             |
| Device ID                                                                                                                                        | -----                                   | B7          |             |
| Participant ID number                                                                                                                            |                                         | B8          |             |
| Sub-city                                                                                                                                         |                                         | B9          |             |
| Sample ID                                                                                                                                        |                                         | B10         |             |
| Total cholesterol<br><i>[CHOOSE ACCORDINGLY: mmol/l OR mg/dl]</i>                                                                                | <i>mmol/l-----</i><br><i>mg/dl-----</i> | B11         |             |
| During the past two weeks, have you been treated for raised cholesterol with drugs (medication) prescribed by a doctor or other health worker?   | Yes 1<br>No 2                           | B12         |             |
| <b>EXPANDED: Triglycerides and HDL Cholesterol</b>                                                                                               |                                         |             |             |
| <b>Question</b>                                                                                                                                  | <b>Response</b>                         | <b>Code</b> | <b>Skip</b> |
| Triglycerides<br><i>[CHOOSE ACCORDINGLY: mmol/l OR mg/dl]</i>                                                                                    | <i>mmol/l-----</i><br><i>mg/dl-----</i> | B13         |             |
| HDL Cholesterol<br><i>[CHOOSE ACCORDINGLY: mmol/l OR mg/dl]</i>                                                                                  | <i>mmol/l-----</i><br><i>mg/dl-----</i> | B14         |             |
