# Supplementary material for: Prevalence and risk factors of hypertension among adults: A community based study in Addis Ababa, Ethiopia
Source: PubMed Central journal article supplement (PMC8016337; doi:10.1371/journal.pone.0248934), 2021-04-01
Supplement: pone.0248934.s003.pdf [file pone.0248934.s003.pdf]

|  |  |  |  |  |  |
|--|--|--|--|--|--|
|  |  |  |  |  |  |
|--|--|--|--|--|--|

## Annex II :- Amharic version questionnaire

የስምምነት ቅጽ

አዲስ አበባ ዩኒቨርሲቲ

ጤና ሳይንስ ኮሌጅ

የኅብረተሰብ ጤና ትምህርት ቤት

ይህ ቃለ መጠይቅ በአዲስ አበባ ከተማ የሚኖሩ አዋቂዎች ላይ ተላላፊ ያልሆኑ በሽታዎችን ማለትም የደም ግፊት፣ የስፔር ህመም እንዲሁም በደም ውስጥ የቅባት መጠን አለመመጣጠንን ስርጭት እና መንስኤ ሊሆኑ የሚችሉ ምክንያቶችን ለማጥናት የተዘጋጀ ነው።

**የዳሰሳ ጥናቱ የሚፈልገው መረጃ፡-**

| መረጃው የሚሰበሰብበት ቦታና ቀን               | ምላሽ/ መልስ                             | ኮድ  | ማለፍ/ መዝለል |
|------------------------------------|--------------------------------------|-----|-----------|
| የአካባቢው/ ስፍራው መለያ ቁጥር               | -----                                | 11  |           |
| የክፍለ ከተማ ስም                        | -----                                | 12  |           |
| የሰፈር/ የመንደር ስም                     | -----                                | 13  |           |
| የጠያቂው ሙሉ ስም እና መለያ ቁጥር             | -----                                | 14  |           |
| መጠይቁ ሙሉውኑ ተሞልቶ ያለቀበት ቀን            | ቀን-----ወር-----ዓ.ም---<br>-----        | 15  |           |
| <b>ፍቃደኝነት፣ የተጠየቁበት ቋንቋና ስም</b>     |                                      |     |           |
| ይሁንታን ስለመጠየቅ እና ስለጥናቱ ማብራሪያ ስለመስጠቱ | 1. ተስማምተዋል 2.አልስማምም<br>; ካልተስማሙ ማቋረጥ | 16  |           |
| የተጠየቁበት ቋንቋ                        | አማርኛ                                 | 17  |           |
| የተጠየቁበት ስአት                        | ስአት-----ደቂቃ-----                     | 18  |           |
| የተሳታፊ የሚስጥር ቁጥር                    | -----                                | 19  |           |
| የተሳታፊው ሙሉ ስም                       | -----                                | 110 |           |
| የተሳታፊው አድራሻ ወይም ስልክ ቁጥር            | -----                                | 111 |           |

**ክፍል 1 ግለሰባዊ መረጃዎች**

**ቁልፍ ግለሰባዊ መረጃዎች**

| ተ/ቁ | ጥያቄ                            | ምላሽ/ መልስ                                          | ኮድ | ማለፍ/ መዝለል       |
|-----|--------------------------------|---------------------------------------------------|----|-----------------|
| 1   | ጾታ                             | ወንድ-----1<br>ሴት-----2                             | C1 |                 |
| 2   | የልደት ቀንዎ መቼ ነው?                | ቀን-----ወር-----ዓ.ም-----                            | C2 | ካወቁት →<br>ተ/ቁ 4 |
| 3   | እድሜዎ ስንት ነው?                   | -----አመት                                          | C3 |                 |
| 4   | የትውልድ ቦታዎ የት ነው?               | ገጠር-----1<br>ከተማ-----2<br>አላውቀውም-----3            | C4 |                 |
| 5   | አዲስ አበባ ከተማ ውስጥ ለስንት አመት ኖረዋል? | -----ወራት<br>-----አመታት<br>አዲስ አበባ ነው የተወለድኩት-----1 | C5 |                 |

|  |  |  |  |  |  |
|--|--|--|--|--|--|
|  |  |  |  |  |  |
|--|--|--|--|--|--|

|                                |                                                                         |                                                                                                                                                                                                                                         |     |                 |
|--------------------------------|-------------------------------------------------------------------------|-----------------------------------------------------------------------------------------------------------------------------------------------------------------------------------------------------------------------------------------|-----|-----------------|
| 6                              | በአጠቃላይ መደበኛ ትምህርት የተማሩት ለስንት አመታት ነው? መዋዕለ ህፃናትን ወይም ቄስ ትምህርት ቤትን ሳይጨምር | -----አመት<br>አላስታውስም-----88                                                                                                                                                                                                              | C6  |                 |
| <b>የተባራራ መጠይቅ፤ ግልሰባዊ መረጃዎች</b> |                                                                         |                                                                                                                                                                                                                                         |     |                 |
| 8                              | መደበኛ ትምህርት ተከታትለዋል?                                                     | አዎ -----1<br>የለም-----2                                                                                                                                                                                                                  | C8  | የለም →<br>ተ/ቁ 10 |
| 9                              | ከፍተኛ የትምህርት ደረጃዎ ስንት ነው?                                                | የመጀመሪያ ደረጃ (1-8)-----1<br>ሁለተኛ ደረጃ (9-10)-----2<br>መሰናዶ (11-12)-----3<br>የሙያ ትምህርት-----4<br>ኮሌጅ እና ከዚያ በላይ-----5<br>መልስ የለኝም-----88                                                                                                     | C9  |                 |
| 10                             | የየትኛው ብሄር አባል ነዎ?                                                       | አማራ-----1<br>ኦሮሞ-----2<br>ጉራጌ-----3<br>ትግራይ-----4<br>ሌላ -----5<br>ሌላ ካለ ይጥቀሱ-----<br>መመለስ አልፏልግም-----88                                                                                                                                 | C10 |                 |
| 11                             | የትዳር ሁኔታዎ እንዴት ነው?                                                      | ምንም ያላገቡ-----1<br>ያገቡ-----2<br>የተለያዩ-----3<br>የተፋቱ-----4<br>የትዳር አጋራቸውን በሞት ያጡ-----5<br>መልስ የለኝም-----88                                                                                                                                 | C11 |                 |
| 12                             | ሃይማኖትዎ ምንድነው?                                                           | ኦርቶዶክስ-----1<br>ሙስሊም-----2<br>ፕሮቴስታንት-----3<br>ካቶሊክ-----4<br>ሌላ -----5<br>ሌላ ካለ ይጥቀሱ-----                                                                                                                                               | C12 |                 |
| 13                             | ከሚከተሉት የማብራሪያ ሐረጎች ባለፉት 12 ወራት የትኛው መልስ የነበሩበትን የስራ ሁኔታ በሚገባ ይገልጻል?     | የመንግስት ሰራተኛ-----1<br>መንግስታዊ ያልሆኑ ድርጅቶች ተቀጣሪ--2<br>በግል ተዳዳሪ-----3<br>ተማሪ-----4<br>የቤት አመቤት-----5<br>የቀን ሰራተኛ-----6<br>ነጋዴ-----7<br>ስራ የሌለው ግን መስራት የሚችል----8<br>ስራ የሌለውና መስራት የማይችል----9<br>ጡረተኛ-----10<br>ሌላ -----11<br>ሌላ ካለ ይጥቀሱ----- | C13 |                 |

|  |  |  |  |  |  |
|--|--|--|--|--|--|
|  |  |  |  |  |  |
|--|--|--|--|--|--|

|    |                                                                                 |                                                      |     |  |
|----|---------------------------------------------------------------------------------|------------------------------------------------------|-----|--|
| 14 | በሚኖሩበት ቤት ውስጥ ከእርስዎ ጋር በተጨማሪ ዕድሜአቸው ከ 18 ዓመት በላይ የሆኑት የቤተሰብ አባላት ቁጥር ምን ያህል ነው? | የሰዎች ብዛት በቁጥር-----                                   | C14 |  |
| 15 | ከእርስዎ ጋር የቤተሰብዎ ብዛት ስንት ነው?                                                     | የሰዎች ብዛት በቁጥር-----                                   | C15 |  |
| 16 | ወርሃዊ የመተዳደሪያ ገቢዎን ሊገልጹልን ይዎዳሉ?                                                  | -----ብር<br>ምንም ገቢ የለኝም -----98<br>ለመመለስ አልፈልግም----88 | C16 |  |

**ክፍል 2- የባህሪ መለያዎች**

**ቁልፍ - ትንባሆ/ ሲጃራ ማጨስን በተመለከተ**

**ከዚህ ቀጥሎ ሲጃራ ወይም ትንባሆ ማጨስን በተመለከተ እጠይቀዎታለሁ**

| ተ/ቁ        | ጥያቄ                                                                  | ምላሽ/ መልስ                                             | ኮድ                | ማለፍ/ መዘለል            |              |
|------------|----------------------------------------------------------------------|------------------------------------------------------|-------------------|----------------------|--------------|
| 17         | ባሁኑ ወቅት ሲጃራ ያጨሳሉ? ለምሳሌ:- ሲጃራ፣ ፒፓ፣ ጋያ                                 | አጨሳለሁ-----1<br>አላጨሰም-----2                           | T1                | አላጨሰም<br>→<br>ተ/ቁ 24 |              |
| 18         | ባሁኑ ወቅት ሲጃራ በየቀኑ ያጨሳሉ?                                               | አጨሳለሁ-----1<br>አላጨሰም-----2                           | T2                |                      |              |
| 19         | ሲጃራ ማጨስ የጀመሩት በስንት አመትዎ ነበር?                                         | -----አመቴ<br>እድሜዬን አላስትውስም-----88                     | T3                |                      |              |
| 20         | ለምን ያህል ዘመን እንዳጨሱ ያስታውሳሉ?                                            | -----አመት<br>-----ወራት<br>-----ሳምንታት<br>አላስትውስም-----88 | T4a<br>T4b<br>T4c |                      |              |
| 21         | በአማካይ በእያንዳንዱ ቀን ወይም ሳምንት ጊዜ ውስጥ የሚከተሉትን ምርቶች ምን ያህል ያጨሳሉ ወይም ይጠቀማሉ? |                                                      | በየቀኑ              | በየሳምንቱ               |              |
|            |                                                                      | በፋብሪካ የተመረቱ ሲጃራዎችን                                   |                   |                      | T5a/Ts<br>aw |
|            |                                                                      | በእጅ የሚጠቀሙ ሲጃራዎችን                                     |                   |                      | T5b/T<br>sbw |
|            |                                                                      | ፒፓዎችን                                                |                   |                      | T5c/Ts<br>cw |
|            |                                                                      | በትንባሆ ቅጠል የተጠቀሙ ሲጃራዎችን                               |                   |                      | T5d/T<br>sdw |
|            |                                                                      | ሺሻዎችን በቁጥር                                           |                   |                      | T5e/Ts<br>ew |
|            |                                                                      | ሌላ                                                   |                   |                      | T5f/Ts<br>fw |
|            |                                                                      | ሌላ ካለ ይግለጹ                                           |                   |                      |              |
| አላውቀውም--88 |                                                                      |                                                      |                   |                      |              |

|  |  |  |  |  |  |
|--|--|--|--|--|--|
|  |  |  |  |  |  |
|--|--|--|--|--|--|

|    |                                                         |                                                             |    |                    |
|----|---------------------------------------------------------|-------------------------------------------------------------|----|--------------------|
| 22 | ባለፉት 12 ወራት ማጨስ ለማቆም ሙከራ አድርገዋል?                        | አዎ -----1<br>የለም አላደረጉም-----2                               | T6 |                    |
| 23 | ባለፉት 12 ወራት ወደ ህክምና ሲሄዱ የጤና ሙያተኞች ማጨስ እንዲያቆሙ ነግረዎት ነበር? | አዎ-----1<br>የለም-----2<br>በ12 ወራት ውስጥ ወደ ሃኪም ቤት አልሄድኩም-----3 | T7 |                    |
| 24 | በህይወት ዘመንዎ የትምባሆ ምርቶችን ተጠቅመው ያውቃሉ?                      | አዎ-----1<br>የለም -----2                                      | T8 | የለም<br>→<br>ተ/ቁ 28 |
| 25 | በህይወት ዘመንዎ የትምባሆ ምርቶችን በየቀኑ ይጠቀሙ ነበር?                   | አዎ-----1<br>የለም-----2                                       | T9 |                    |

**የተብራራ መጠይቅ ፤ ማጨስዎን በተመለከተ**

| ተ/ቁ | ጥያቄ                                                                           | ምላሽ/መልስ                                | ኮድ   | ማለፍ/ መዘለል          |                |
|-----|-------------------------------------------------------------------------------|----------------------------------------|------|--------------------|----------------|
| 26  | ማጨስ ሲያቆሙ እድሜዎ ስንት ነበር?                                                        | -----እድሜ<br>አላውቀውም-----88              | T10  |                    |                |
| 27  | ማጨስ ካቆሙ ምን ያህል ጊዜ ሆነዎት?                                                       | -----አመት                               | T11a |                    |                |
|     |                                                                               | -----ወራት                               | T11b |                    |                |
|     |                                                                               | -----ሳምንታት                             | T11c |                    |                |
| 28  | በአሁኑ ወቅት ጭስ የሌላቸውን የትምባሆ ምርቶች ይጠቀማሉ? ለምሳሌ፤ የሚሸተት፤ የሚታኘክ፤ በምግብ የሚወሰድ           | አዎ-----1<br>የለም-----2                  | T12  | የለም<br>→<br>ተ/ቁ 31 |                |
| 29  | በአሁኑ ወቅት ጭስ የሌላቸውን የትምባሆ ምርቶች በየቀኑ ይጠቀማሉ? ለምሳሌ፤ የሚሸተት፤ የሚታኘክ፤ በምግብ የሚወሰድ      | አዎ-----1<br>የለም-----2                  | T13  |                    |                |
| 30  | የሚጠቀሙ ከሆን በአማካይ በቀን ምን ያህል ጊዜ ይጠቀማሉ?<br>(ከቀን ያንስ ከሆን በሳምንት ይያዝ)               |                                        | በየቀኑ | በየሳምንት ቱ           |                |
|     |                                                                               | በአፍ የሚማግ                               |      |                    | T14a/T<br>14aw |
|     |                                                                               | በአፍንጫ የሚሸተት                            |      |                    | T14b/T<br>14bw |
|     |                                                                               | የሚታኘክ                                  |      |                    | T14c/T<br>14cw |
|     |                                                                               | ሌላ                                     |      |                    | T14d/T<br>14dw |
|     |                                                                               | ሌላ ካለ ይጥቀሱ---<br>-----<br>ካላዎቁት 88 ይጻፍ |      |                    |                |
| 31  | በህይወት ዘመንዎ ጭስ የሌላቸው የትምባሆ ምርቶችን ተጠቅመው ያውቁ ነበር? ለምሳሌ፤ የሚሸተት፤ የሚታኘክ፤ በምግብ የሚወሰድ | አዎ-----1<br>የለም-----2                  | T15  | የለም<br>→<br>ተ/ቁ 33 |                |

|  |  |  |  |  |
|--|--|--|--|--|
|  |  |  |  |  |
|--|--|--|--|--|

|    |                                                                                              |                                                                                          |      |                    |
|----|----------------------------------------------------------------------------------------------|------------------------------------------------------------------------------------------|------|--------------------|
| 32 | በህይወት ዘመንዎ ጭስ የሌላቸው የትምባሆ ምርቶች በየቀኑ ተጠቅመው ያውቁ ነበር? ለምሳሌ፣ የሚሸተት፣ የሚታኘክ፣ በምግብ የሚወሰድ            | አዎ-----1<br>የለም-----2                                                                    | T 16 |                    |
| 33 | በለፉት 30 ቀናት በቤትዎ ውስጥ ሲጃራ የሚያጨስ ሰው ነበር? (ሲጃራ የማያጨሱ ከሆነ)                                       | አዎ-----1<br>የለም-----2<br>አላስታውስም-----88                                                  | T 17 |                    |
| 34 | በለፉት 30 ቀናት እርስዎ በሚገኙበት ጠባብ ክፍል ውስጥ ሲጃራ የሚያጨስ ሰው ነበር? ለምሳሌ፣ በሚኖሩበት ህንፃ፣ በሚሰሩበት ስፍራ፣ በቢሮዎ ውስጥ | አዎ-----1<br>የለም-----2<br>በተጣበበ ቦታ ስራ አልሰራም-----3                                         | T18  |                    |
| 35 | በአሁኑ ወቅት ጫት ይቅማሉ?                                                                            | አዎ-----1<br>የለም-----2<br>መመለስ አልፈልግም-----88                                              | T19  | የለም<br>→<br>ተ/ቁ 42 |
| 36 | በአማካይ በአንድ ወር ጊዜ ውስጥ ለምን ያህል ቀናት ጫት ይቅማሉ?                                                    | በየቀኑ/በየቀኑ በሚያስብል ሁኔታ-----1<br>በየሳምንቱ-----2<br>በየወሩ-----3<br>ሌላ -----4<br>ሌላ ካለ ይጥቀሱ----- | T20  |                    |
| 37 | በአንድ ጊዜ በሚቅሙበት ወቅት ምን ያህል ዙርባ ወይም እስር ይቅማሉ?                                                  | -----ዙርባ/ እስር                                                                            | T20a |                    |
| 38 | ጫት መቃም የጀመሩት በስንት አመትዎ ነበር?                                                                  | -----አመቱ                                                                                 | T21  |                    |
| 39 | ለምን ያህል ዘመን/ጊዜ ጫት ቅመዋል?                                                                      | -----ሳምንታት<br>-----ወራት<br>-----አመታት                                                      | T22  |                    |
| 40 | በህይወት ዘመንዎ ጫት ቅመው ያውቃሉ?                                                                      | አዎ-----1<br>የለም-----2<br>መልስ የለኝም-----88                                                 | T23  | የለም<br>→<br>ተ/ቁ 43 |
| 41 | ጫት መቃም ያቆሙት በስንት አመትዎ ነበር?                                                                   | -----አመቱ                                                                                 | T24  |                    |
| 42 | ጫት መቃም ካቆሙ ምን ያህል ዘመን/ ጊዜ ሆኖዎታል?                                                             | -----ሳምንታት<br>-----ወራት<br>-----አመታት                                                      | T25  |                    |

**ቁልፍ፣ የአልኮል አወሳሰድን በተመለከተ**

**የሚከተሉት መጠይቆች የአልኮል ፍጀታዎን እና አወሳሰድዎን የሚመለከቱ ይሆናሉ**

| ተ/ቁ | ጥያቄ                                           | ምላሽ/መልስ               | ኮድ | ማለፍ/ መዘለል          |
|-----|-----------------------------------------------|-----------------------|----|--------------------|
| 43  | የአልኮል መጠጦችን ይጠጣሉ? ለምሳሌ፡- ቢራ፣ ወይን፣ አረቂ፣ውስኪ ወዘተ | አዎ-----1<br>የለም-----2 | A1 | የለም<br>→<br>ተ/ቁ 61 |

|  |  |  |  |  |
|--|--|--|--|--|
|  |  |  |  |  |
|--|--|--|--|--|

|    |                                                                                             |                                                                                                                                                    |      |                    |
|----|---------------------------------------------------------------------------------------------|----------------------------------------------------------------------------------------------------------------------------------------------------|------|--------------------|
| 44 | በለፉት 12 ወራት የአልኮል መጠጦችን ወስደው/ ጠጥተው ያውቃሉ?                                                    | አዎ-----1<br>የለም-----2                                                                                                                              | A2   | አዎ<br>→<br>ተ/ቁ 46  |
| 45 | መጠጥ መጠጣትን በጤናዎ ምክንያት አቁመዋል? ምን ማለቱ ነው በጤናዎ ላይ አሉታዊ ተፅእኖ በማሳደሩ? (ወይም የጤና ሙያተኛ በሰጠዎ ምክር የተነሳ) | አዎ-----1<br>የለም-----2                                                                                                                              | A3   | አዎ<br>→<br>ተ/ቁ 61  |
| 46 | በለፉት 12 ወራት በተደጋጋሚ በሚያስብል ስሌት ቢያንስ አንድ መደበኛ/ የአልኮል መጠን ያለው መጠጥን ለምን ያህል ጊዜ አዘውትረው ነበር?      | በየቀኑ-----1<br>በሳምንት ለ5 ወይም 6 ቀናት-----2<br>በሳምንት ከ3 እስከ 4 ቀናት-----3<br>በሳምንት 1 ወይም 2 ቀናት-----4<br>በወር ከ1 እስከ 3 ቀናት-----5<br>በወር ከ1 ቀን ያነሰ ቀናት-----6 | A4   |                    |
| 47 | በለፉት 30 ቀናት የአልኮል መጠጥ ወስደው ወይም ጠጥተው ያውቃሉ?                                                   | አዎ-----1<br>የለም-----2                                                                                                                              | A5   | የለም<br>→<br>ተ/ቁ 60 |
| 48 | በለፉት 30 ቀናት በምን ያህል የተለያዩ ዝግጅቶች ላይ ቢያንስ አንድ መደበኛ የአልኮል መጠጥ ጠጥተዋል?                           | በቁጥር ይግለጹ-----<br>አላውቅም-----88                                                                                                                     | A6   |                    |
| 49 | በለፉት 30 ቀናት በአማካይ ለምን ያህል ጊዜ መደበኛ የአልኮል ይዘት ያላቸውን መጠጦች በግብዣ ኩነቶች ጠጥተዋል?                     | በቁጥር ይግለጹ-----<br>አላውቅም-----88                                                                                                                     | A7   |                    |
| 50 | በለፉት 30 ቀናት ብዛት ያለው መደበኛ የአልኮል መጠጥ በአንድ አጋጣሚ ጠጥተው ከሆነ የሁሉንም መጠጥ አይነት የጠጡትን ደምረው ቢነግሩኝ?      | ትልቁ የጠጡት የመጠጥ ቁጥር-----<br>አላውቅም-----88                                                                                                             | A8   |                    |
| 51 | በለፉት 30 ቀናት ስድስት እና ከዚያ በላይ የሆኑ መደበኛ የአልኮል መጠጦችን በአንድ ግብዣ ብቻ ለምን ያህል ጊዜ ተጠቅመዋል?             | የተጠቀሙበት የጊዜ መጠን በቁጥር-----<br>አላውቅም-----88                                                                                                          | A9   |                    |
| 52 | ለወንዶች፤ አምስት እና ከአምስት በላይ                                                                    | የተጠቀሙበት የጊዜ መጠን በቁጥር-----<br>አላውቅም-----88                                                                                                          | A10  |                    |
| 53 | ለሴቶች፤ አራት እና ከአራት በላይ                                                                       | የተጠቀሙበት የጊዜ መጠን በቁጥር-----<br>አላውቅም-----88                                                                                                          | A11  |                    |
| 54 | ባለፉት ሰባት ቀናት ውስጥ ምን ያህል መደበኛ የአልኮል መጠጦችን በየእለቱ ጠጥተዋል?                                       | ስኞ                                                                                                                                                 | A13a |                    |
|    |                                                                                             | ማክሰኞ                                                                                                                                               | A13b |                    |
|    |                                                                                             | ረቦ                                                                                                                                                 | A13c |                    |
|    |                                                                                             | ሐሙስ                                                                                                                                                | A13d |                    |
|    |                                                                                             | አርብ                                                                                                                                                | A13e |                    |
|    |                                                                                             | ቅዳሜ                                                                                                                                                | A13f |                    |
|    |                                                                                             | እሁድ                                                                                                                                                | A13g |                    |
|    |                                                                                             | አላውቅም-----88                                                                                                                                       |      |                    |

እስካሁን ድረስ ላለፉት ሰባት ቀናት ስለጠጡት አልኮል ነበር ስንገባ የነበረው በቀጣይ ልጠይቀዎት የምፈልገው ሁሉንም አይነት አልኮሎች ሳይሆን በቤት ውስጥ የሚዘጋጁ፣ ከውጭ አገር የሚገቡ የአልኮል መጠጦችን፣ በተለይም የመንግስት ቀረጥ ሳይከፈልባቸው ለመጠጥ ፍጆታ የማይውሉ ደንበር አቋርጠው የሚገቡ መጠጦችን በተመለከተ ይሆናል። ስለሆነም ጥቂት ጊዜ ወስደው ያስቡበት እና

|  |  |  |  |  |
|--|--|--|--|--|
|  |  |  |  |  |
|--|--|--|--|--|

**ጥያቄዎችን ይመልሱልኛል።**

| ተ/ቁ                                                | ጥያቄ                                                                                                            | ምላሽ/መልስ                                                                     | ኮድ   | ማለፍ/መዘለል           |
|----------------------------------------------------|----------------------------------------------------------------------------------------------------------------|-----------------------------------------------------------------------------|------|--------------------|
| 55                                                 | ላለፉት ሰባት ቀናት በቤት ውስጥ የተዘጋጀ፣ ለመጠጥ ፍጆታ ፍቃድ ሳይኖራቸው ቀረጥ ሳይከፈልባቸው ደንበር አቋርጠው የገቡ መጠጦችን ጠጥተዋል? ለምሳሌ ጠላ፣ ጠጅ፣ የሃበሻ አረቂ | አዎ-----1<br>የለም-----2                                                       | A14  | የለም<br>→<br>ተ/ቁ 57 |
| 56                                                 | ባለፉት ሰባት ቀናት በአማካይ ምን ያህል መደበኛ የአልኮል መጠጦችን ጠጥተዋል?                                                              | በቤት ውስጥ የተዘጋጀ የተጣራ አልኮል ለምሳሌ ጠላ-----                                        | A15a |                    |
|                                                    |                                                                                                                | በቤት ውስጥ የተዘጋጀ ጠጅ--                                                          | A15b |                    |
|                                                    |                                                                                                                | በቤት ውስጥ የተዘጋጀ አረቂ---                                                        | A15c |                    |
|                                                    |                                                                                                                | ከአገር ውጭ የገቡ የአልኮል መጠጦች-----<br>-----                                        | A15d |                    |
|                                                    |                                                                                                                | ለመጠጥ ፍጆታ ያልተፈቀዱ እና ቀረጥ ሳይከፈልባቸው ደንበር አቋርጠው የገቡ መጠጦች-----                    | A15e |                    |
|                                                    |                                                                                                                | ሌሎች ታክስ ያለልተከፈለባቸው መጠጦች-----                                                | A15f |                    |
|                                                    |                                                                                                                | አላውቅም-----88                                                                |      |                    |
| <b>ማበራሪያ የሚጠይቁ ጥያቄዎች፣ የአልኮል መጠጥ አወሳሰደዎን በተመለከተ</b> |                                                                                                                |                                                                             |      |                    |
| 57                                                 | ባለፉት 12 ወራት ከመጠጥ ለመቆጠብ አስበው ሲሞክሩ ለምን ያህል ጊዜ አልቻሉም?                                                             | በየቀኑ-----1<br>በየሳምንቱ-----2<br>በወራት-----3<br>ከወር ባነሰ-----4<br>አልሞከርኩትም-----5 | A16  |                    |
| 58                                                 | ባለፉት 12 ወራት ለምን ያህል ጊዜ መስራት የፈለጉትን ጉዳይ ለማሳካት አስበው መጠጥ በመጠጣተዎ ምክንያት ብቻ ዳር ያልደረሰልዎ ስራ አለ?                        | በየቀኑ-----1<br>በየሳምንቱ-----2<br>በወራት-----3<br>ከወር ባነሰ-----4<br>በጭራሽ-----5     | A17  |                    |
| 59                                                 | ባለፉት 12 ወራት መጠጥ ከጠጡ በኋላ የተለመደ ስራዎችን ለመስራት ለምን ያህል ጊዜ አቅቶዎታል?                                                   | በየቀኑ-----1<br>በየሳምንቱ-----2<br>በወራት-----3<br>ከወር ባነሰ-----4<br>በጭራሽ-----5     | A18  |                    |



|  |  |  |  |  |
|--|--|--|--|--|
|  |  |  |  |  |
|--|--|--|--|--|

|    |                                                                                    |                                                                         |     |  |
|----|------------------------------------------------------------------------------------|-------------------------------------------------------------------------|-----|--|
| 60 | ባለፉት 12 ወራት አብዝተው ጠጥተው ካደሩ በኋላ በማለዳ ወደ ስራ ከመግባተዎ በፊት አልኮል መቅመስ ለምን ያህል ጊዜ አስፈልጎታል? | በየቀኑ-----1<br>በየሳምንቱ-----2<br>በወራት-----3<br>ከወር ባነሱ-----4<br>በጭራሽ-----5 | A19 |  |
|----|------------------------------------------------------------------------------------|-------------------------------------------------------------------------|-----|--|

**ቁልፍ ፣ አመጋገብን በተመለከተ**

የሚቀጥሉት መጠይቆች መሰረት የሚያደርጉት በአመጋገብ ስርአት ውስጥ አትክልትና ፍራፍሬዎችን በዘወትር ገበታዎ ላይ መጠቀምን ይመለከታል። በካርዱ ላይ ያለው እያንዳንዱ ስዕል ለአገልገሎት ሊውል የሚችለውን የምግብን መጠን ይገልጻል። እባክዎ ከባለፈው አመት ትዝታዎ አንድ ሁነኛ ሳምንት አስታውሰው ይገነዘቡ።

| ተ/ቁ | ጥያቄ                                                                                                                  | ምላሽ/ መልስ                              | ኮድ | ማለፍ/ መዘለል            |
|-----|----------------------------------------------------------------------------------------------------------------------|---------------------------------------|----|----------------------|
| 61  | በአንድ ሁነኛ ሳምንት ለምን ያህል ቀናት ፍራፍሬ ተመግበዋል?                                                                               | ቀኖቹን በቁጥር ይጥቀሱ-----<br>አላውቀውም-----88  | D1 | ዜሮ ቀን<br>→<br>ተ/ቁ 63 |
| 62  | ፍራፍሬ በተመገቡበት ባንዱ ቀን ውስጥ ምን ያህል የገበታ አቅርቦት ፍራፍሬዎችን ያካተተ ነበር? (ለምሳሌ:- የተከፈለ ወይም አንድ ሙሉ ማንጎ፣ ብርቱካን፣ ፓፓዬ የመሳሰሉትን ማለቴ ነው) | የገበታ አቅርቦት በቁጥር-----<br>አላውቀውም-----88 | D2 |                      |
| 63  | በአንድ ሁነኛ ሳምንት ለምን ያህል ቀናት አትክልቶችን ተመግበዋል?                                                                            | ቀኖቹን በቁጥር ይጥቀሱ-----<br>አላውቀውም-----88  | D3 | ዜሮ ቀን<br>→<br>ተ/ቁ 65 |
| 64  | አትክልቶችን በተመገቡበት ባንዱ ቀን ውስጥ ምን ያህል የገበታ አቅርቦት አትክልቶችን ያካተተ ነበር? (ለምሳሌ:- በጭልፋ፣ በማንኪያ....)                              | የገበታ አቅርቦት በቁጥር-----<br>አላውቀውም-----88 | D4 |                      |

**በምግብ ገበታዎ ውስጥ የጨው አጠቃቀምን በተመለከተ**

በሚቀጥሉት መጠይቆች ማተኮር የምፈልገው በምግብ ውስጥ ስለሚጠቀሙት የጨው (ጥሬ ጨው) መጠን ነው። የገበታ ጨው የሚባሉት መደበኛ የገበታ ጨው (የታሽጎ)፣ ከውቅያኖስ የሚወጣ ያልተጣራ ጨው፣ አዮዳይዝድ የገበታ ጨው፣ አሞሌ ወይም የደቀቀ አሞሌ፣ የሾርባ ጨው፣ ሶያ የሾርባ ጨው፣ ማጂ መረቅ፣ የቲማቲም ሶስ ወይም የአሳ ሾርባ ጨው ሊሆኑ ይችላሉ። የሚከተሉት ጥያቄዎች በምግብ ውስጥ ስለሚጨምሩት ጨው የሚመለከቱ ናቸው። ይህም ሲባል ከመመገብ በፊት ምግብ ውስጥ ስለሚጨምሩት የጨው መጠን፣ ምግብ በቤት እንዴት እንደሚዘጋጅ፣ ከፍተኛ የሆነ የጨው መጠን ያላቸውን የታሽጎ ወይም የተዘጋጁ ምግቦችን እንደሚጠቀሙ፣ በምግብ ውስጥ ያለውን የጨው መጠን እንዴት እንደሚቆጣጠሩ የሚሉ ይገኙበታል። እባክዎ አነስተኛ ጨው ነው በምግብዎ የምጠቀሙ የሚሉ ቢሆን እንኳን ለጥያቄዎች መልስ ይስጡባቸው።

| ተ/ቁ | ጥያቄ                                                                                          | ምላሽ/ መልስ                                                                                     | ኮድ | ማለፍ/ መዘለል |
|-----|----------------------------------------------------------------------------------------------|----------------------------------------------------------------------------------------------|----|-----------|
| 65  | በምግብ ውስጥ ጨው፣ የሶያ ጨው፣ የቲማቲም ሶስ ምን ያህል አዘውትረው ይጠቀማሉ ከምግብ በፊት ወይም እየተመገቡ እያለ? (አንድ መልስ ብቻ ይምረጡ) | ሁልጊዜ-----1<br>ብዙውን ጊዜ-----2<br>አንዳንድ ጊዜ-----3<br>አልፎ አልፎ-----4<br>በጭራሽ-----5<br>አላውቅም-----88 | D7 |           |

|  |  |  |  |  |
|--|--|--|--|--|
|  |  |  |  |  |
|--|--|--|--|--|

|    |                                                                                                                                                                |                                                                                                                      |     |  |
|----|----------------------------------------------------------------------------------------------------------------------------------------------------------------|----------------------------------------------------------------------------------------------------------------------|-----|--|
| 66 | በቤትዎ ውስጥ ምግብ በሚሰሩበትና በሚያዘጋጁበት ወቅት ጨዋማ የሆነ፣ የጨው ማጣፈጫ፣ የቲማቲም ሶስ የሆነ ወይም የሾርባ ጨው ምን ያህል ይጨምራሉ?                                                                    | ሁልጊዜ----- 1<br>ብዙውን ጊዜ----- 2<br>አንዳንድ ጊዜ----- 3<br>አልፎ አልፎ----- 4<br>በጭራሽ----- 5<br>አላውቅም-----88                    | D8  |  |
| 67 | ከፍተኛ የጨው መጠን ተጨምሮባቸው የተዘገጁ ምግቦችን ምን ያህል ያዘወትራሉ? ይህን ስል ምግብን ለማቆየት ሲባል ከፍተኛ የጨው መጠን በምግብ ውስጥ ይጨመራል ለምሳሌ፡- የታሸጉ ምግቦች፣ ቱና፣ የድንች ጥብስ፣ ቋንጣ፣ ቺዝ የመሳሰሉትን ለማለት ፈልጌ ነው። | ሁልጊዜ----- 1<br>ብዙውን ጊዜ----- 2<br>አንዳንድ ጊዜ----- 3<br>አልፎ አልፎ----- 4<br>በጭራሽ----- 5<br>አላውቅም-----88                    | D9  |  |
| 68 | የሚጠቀሙት የጨው እና የሶያ ጨው መጠን ምን ያህል ነው ብለው ያስባሉ?                                                                                                                   | እጅግ በጣም ብዙ-----1<br>በጣም ብዙ-----2<br>ትክክለኛውን መጠን -----3<br>አነስተኛ መጠን እጠቀማለሁ--4<br>አልጠቀምም ማለት ይቻላል--5<br>አላውቀውም-----88 | D10 |  |

**የሚቀጥሉት መጠይቆች በቤተሰብ ውስጥ ወይም ከቤትዎ ውጭ ምግብ ሲመጡ ስላለው የቅባት እና የዘይት አጠቃቀም ላይ ይሆናል**

| ተ/ቁ | ጥያቄ                                                                              | ምላሽ/ መልስ                                                                                                                                                                                                   | ኮድ  | ማለፍ/ መዘለል |
|-----|----------------------------------------------------------------------------------|------------------------------------------------------------------------------------------------------------------------------------------------------------------------------------------------------------|-----|-----------|
| 69  | በአብዛኛው ጊዜ በቤተሰብ ውስጥ ምግብ ሲዘጋጅ የሚጠቀሙት ዘይት ወይም ቅባት ምን ዓይነት እንደሆነ ይምረጡ               | የአትክልት ዘይት-----1<br>ጠጣር(የሚረጋ) የአትክልት ዘይት (ቫይኪንግ፣ ቺፍ)-----2<br>የሰሊጥ/የኑግ/የሱፍ ዘይት-----3<br>ቅቤ-----4<br>ማርጋሪን-----5<br>ሽኖ ለጋ/ ሻዲ ለጋ-----6<br>ሌላ -----7<br>ሌላ ካለ ይጥቀሱ-----<br>ምንም አልጠቀምም-----98<br>አላውቅም-----88 | D15 |           |
| 70  | በአማካይ በሳምንት ውስጥ ከቤትዎ ውጭ የተዘጋጁ ምግቦችን ለምን ያህል ጊዜ ይጠቀማሉ? ማለቴ ቁርስ፣ ምሳ ወይም ራት ማለቴ ነው። | በቁጥር ይግለጹ-----<br>አላውቅውም -----88<br>አልመገብም-----98                                                                                                                                                          | D16 |           |

**ቁልፍ፣ የአካል እንቅስቃሴን በተመለከተ**

ከዚህ ቀጥሎ ደግሞ በሳምንት ውስጥ የተለያዩ ተግባራትን ለመከወን ስለሚያደርጉት አካላዊ እንቅስቃሴ እጠይቃለሁ። እባክዎ እነዚህን ጥያቄዎች ንቁ የአካል እንቅስቃሴ የማድረግ ሰው አይደለሁም ቢሉ እንኳን ምላሽ ይስጡባቸው። በመጀመሪያ በስራ ላይ ሆነው ያሳለፉትን ጊዜ ያስታውሱ/ ያስሉ።ያከናውኑት ስራ ክፍያ ያለው ወይም የሌለው ሊሆን ይችላል፤ ማንበብ፣ ትኩረት የሚሻ ምርምር፣ የቤት ውስጥ ስራዎች፣ አዝርኦት ማጨድ፣ አሳ ማስገር፣ ስራ ፍለጋ ዘረው ሊሆን ይችላል። በሚቀጥሉት መጠይቆች ውስጥ "ጥልቅ ትኩረትና አንክሮ የሚጠይቁ ተግባራት" የሚለው ሀረግ ጠንካራ ጉልበት ብሎም ብዙ ትንፋሽ የሚያስወጣ ስራ ወይም ተግባርን ይዎክላል። "መጠነኛ ትኩረት እና አንክሮ የሚጠይቁ ተግባራት" የሚለው ሀረግ ደግሞ ተግባሩ መለስተኛ ጉልበት ብሎም ብዙ ትንፋሽ የማያስወጣ የሚል እንደሆነ እንዲረዱልኝ እፈልጋለሁ።

| ተ/ቁ | ጥያቄ | ምላሽ/ መልስ | ኮድ | ማለፍ/ መዘለል |
|-----|-----|----------|----|-----------|
|-----|-----|----------|----|-----------|

|  |  |  |  |  |  |
|--|--|--|--|--|--|
|  |  |  |  |  |  |
|--|--|--|--|--|--|

| ስራዎን በተመለከተ |                                                                                                                                                                                                    |                            |          |                    |
|-------------|----------------------------------------------------------------------------------------------------------------------------------------------------------------------------------------------------|----------------------------|----------|--------------------|
| 71          | የእርስዎ ስራ ጠንካራ ጉልበት ብሎም ጥልቅ ትኩረት እና አንክሮ ይጠይቃል? ለማብራራት ያህል ስራዎ ብዙ ትንፋሽ የሚያስወጣና የልብን ምት የሚያስጨምሩ ማለትም (ከባድ ሽክምትን ማንቀሳቀስ፣ መቆፈር ወይም የግንባታ ስራዎችን ያጠቃልላል)? በተጨማሪም ቢያንስ ለ 10 ደቂቃዎች ያለማቋረጥ በስራ ላይ ሊቆዩ ይችላሉ? | አዎ-----1<br>የለም-----2      | P1       | የለም<br>→<br>ተ/ቁ 74 |
| 72          | ሁነኛ በተባለ አንድ ሳምንት ውስጥ ለምን ያህል ቀናት ጠንካራ ጉልበት፣ ጥልቅ ትኩረትና አንክሮ የሚጠይቅ ስራ ስርተው ያውቃሉ?                                                                                                                    | የቀናቱን ቁጥር በአሀዝ ይጥቀሱ-----   | P2       |                    |
| 73          | ሁነኛ በተባለ አንድ ቀን ውስጥ ለምን ያህል ሰአት ጠንካራ ጉልበት፣ ጥልቅ ትኩረትና አንክሮ የሚጠይቅ ስራ ይሰራሉ?                                                                                                                           | ሰአት-----ደቂቃ -----          | P3 (a-b) |                    |
| 74          | የእርስዎ ስራ መለስተኛ ጉልበት ብሎም ብዙ ትንፋሽ የማያስወጣ መጠነኛ ትኩረትና አንክሮ የሚፈልግ ስራ ነው? ለምሳሌ ፈጠን ያለ ርምጃ፣ ቀለል ያለ እቃ መሸከም (ቢያንስ ለ 10 ደቂቃ በተከታታይ)                                                                         | አዎ-----1<br>የለም -----2     | P4       | የለም<br>→<br>ተ/ቁ 76 |
| 75          | ሁነኛ በተባለ አንድ ሳምንት ውስጥ ለምን ያህል ቀናት መለስተኛ ጉልበት ብሎም ብዙ ትንፋሽ የማያስወጣ መጠነኛ ትኩረትና አንክሮ የሚፈልግ ስራ ስርተው ያውቃሉ?                                                                                                | የቀናቱን ቁጥር በአሀዝ ይጥቀሱ-----   | P5       |                    |
| 76          | ሁነኛ በተባለ አንድ ቀን ውስጥ ለምን ያህል ሰአት መለስተኛ ጉልበት ብሎም ብዙ ትንፋሽ የማያስወጣ መጠነኛ ትኩረትና አንክሮ የሚፈልግ ስራ ያከናውናሉ?                                                                                                     | ሰአት-----ደቂቃ -----<br>----- | P6 (a-b) |                    |

**ከቦታ ወደ ቦታ መንቀሳቀስን በተመለከተ**

አሁን የምጠይቀውት የሚከተሉት ጥያቄዎች ጉልበት የሚጠይቁ ተግባራትን ሳይሆን በተለመደው እለታዊ እንቅስቃሴ ከቦታ ወደ ቦታ ስለሚያደርጉት ጉዞ ነው። ለምሳሌ ያህል ገበያ ሲገቡ፣ ወደ ሱፐር ማርኬት ሲሄዱ ወይም ወደ ቤተ እምነት ሲሄዱ ስለሚያደርጓቸው እንቅስቃሴዎች እንደሚሉት ነው።

| ተ/ቁ | ጥያቄ                                                                                     | ምላሽ/ መልስ                 | ኮድ       | ማለፍ/ መዘለል          |
|-----|-----------------------------------------------------------------------------------------|--------------------------|----------|--------------------|
| 77  | ከአንድ ቦታ ደርሶ ለመመለስ ቢያንስ 10 ደቂቃዎች የሚወስድ ጉዞን በእግር ወይም ቢስክሌት በመጠቀም ይጓዛሉ?                    | አዎ-----1<br>የለም -----2   | P7       | የለም<br>→<br>ተ/ቁ 80 |
| 78  | በአንድ ሁነኛ በተባለ ሳምንት ውስጥ ለምን ያህል ቀናት በእግር ወይም ቢስክሌት በመጠቀም ቢያንስ ለ10 ደቂቃዎች የሚወስድ ጉዞን ተገዝዋል? | የቀናቱን ቁጥር በአሀዝ ይጥቀሱ----- | P8       |                    |
| 79  | በአንድ ሁነኛ በተባለ እለት ለምን ያህል ሰአት በእግር ወይም ቢስክሌት በመጠቀም ተገዝዋል?                               | ሰአት-----ደቂቃ -----        | P9 (a-b) |                    |

**ለመኖሪያ ወይም ለመዝናናት የሚደረጉ እንቅስቃሴዎችን በተመለከተ**

የሚከተሉት ጥያቄዎች ከላይ የተጠቀሱትን የስራ ወይም የጉዞ እንቅስቃሴዎች አይመለከቱም። ይልቁንም እርስዎ ራስዎን ለማዘናናት መንፈስዎን ለማደስ በሚያደርጓቸው እንቅስቃሴዎች ላይ ትኩረት ያደርጋሉ። ለምሳሌ ስፓርት፣ የአካል ብቃት እንቅስቃሴ እና ለመኖሪያ የሚደረግ ጉዞ የመሳሰሉትን ያጠቃልላል ነገር ግን በቀጣይነት ወይም ያለማቆራረጥ የሚሰሩ ስራዎችን ይመለከታል። (ጂም፣

|  |  |  |  |  |
|--|--|--|--|--|
|  |  |  |  |  |
|--|--|--|--|--|

| ዋና)                                                                                                                                                                                                                      |                                                                                                                                                                       |                               |           |                    |
|--------------------------------------------------------------------------------------------------------------------------------------------------------------------------------------------------------------------------|-----------------------------------------------------------------------------------------------------------------------------------------------------------------------|-------------------------------|-----------|--------------------|
| ተ/ቁ                                                                                                                                                                                                                      | ጥያቄ                                                                                                                                                                   | ምላሽ/ መልስ                      | ኮድ        | ማለፍ/ መዘለል          |
| 80                                                                                                                                                                                                                       | ለራስዎ በሚሰጡት የመዝናኛ ጊዜ ጉልበት የሚጠይቁ እና ትንፋሽ የሚያበዙ ስፖርቶችን ወይም የአካል ብቃት እንቅስቃሴዎችን ቢያንስ ለተከታታይ አስር ደቂቃ ያደርጋሉ (ለምሳሌ- እግር ኳስ ይጫወታሉ፣ ቴኒስ፣ ሩጫ፣ ፈጣን ዋና፣ ጂም፣ በሙዚቃ የታገዘ የሰውነት ማጎልመሻ) | አዎ-----1<br>የለም-----2         | P12       | የለም<br>→<br>ተ/ቁ 83 |
| 81                                                                                                                                                                                                                       | በአንድ ሁነኛ በተባለ ሳምንት ውስጥ ለምን ያህል ቀናት ብርቱ እና አድካሚ ስፖርት፣ የአካል ብቃት እንቅስቃሴ እና የሚያዝናኑ እንቅስቃሴዎችን ያደርጋሉ?                                                                       | የቀናቱን ቁጥር በአሀዝ ይጥቀሱ-<br>----- | P13       |                    |
| 82                                                                                                                                                                                                                       | በአንድ ሁነኛ በተባለ ቀናት ውስጥ ለምን ያህል ሰአት ብርቱ እና አድካሚ ስፖርት፣ የአካል ብቃት እንቅስቃሴ እና የሚያዝናኑ እንቅስቃሴዎችን ያደርጋሉ?                                                                        | ሰአት-----ደቂቃ-----<br>-----     | P14 (a-b) |                    |
| 83                                                                                                                                                                                                                       | መለስተኛ ጉልበት ብሎም ብዙ ትንፋሽ የማያስወጣ መጠነኛ ትኩረትና አንክሮ የሚፈልግ እና ቢያንስ በቀጣይነት ለ10 ደቂቃ የሚሰራ፣ ለምሳሌ ፈጠን ያለ የእግር ጉዞ፣ ሳይክል፣ ዋና፣ የእጅ ኳስ ያካሂዳሉ?                                         | አዎ-----1<br>የለም-----2         | P15       | የለም<br>→<br>ተ/ቁ 86 |
| 84                                                                                                                                                                                                                       | በአንድ ሁነኛ በተባለ ሳምንት ውስጥ ለምን ያህል ቀናት ብርቱ እና አድካሚ ያልሆኑ ለምሳሌ ስፖርት፣ የአካል ብቃት እንቅስቃሴ እና የሚያዝናኑ እንቅስቃሴዎችን ያደርጋሉ?                                                             | የቀናቱን ቁጥር በአሀዝ ይጥቀሱ-<br>----- | P16       |                    |
| 85                                                                                                                                                                                                                       | በአንድ ሁነኛ በተባለ ቀን ውስጥ ለምን ያህል ሰአት ብርቱ እና አድካሚ ያልሆኑ ለምሳሌ ስፖርት፣ የአካል ብቃት እንቅስቃሴ እና የሚያዝናኑ እንቅስቃሴዎችን ያደርጋሉ?                                                               | ሰአት-----ደቂቃ-----<br>-----     | P17 (a-b) |                    |
| <b>አካላዊ እንቅስቃሴን በተመለከተ የተብራራ ምላሽ የሚጠይቁ ጥያቄዎች</b>                                                                                                                                                                         |                                                                                                                                                                       |                               |           |                    |
| <b>ብዙ እንቅስቃሴ ያለማድረግ ባህሪያት</b>                                                                                                                                                                                            |                                                                                                                                                                       |                               |           |                    |
| የሚከተሉት ጥያቄዎች ያለምንም እንቅስቃሴ ወይም የጎላ እንቅስቃሴ በማይጠይቁ ለምሳሌ ያህል በቤት ውስጥ መቀመጥ፣ ገደም ማለት፣ በበረንዳ ላይ ዘወርወር ማለት፣ ከጓደኛ ጋራ በጠረጴዛ ዙሪያ ውይይት ማድረግ፣ በመኪና መጓዝ፣ ማንበብ፣ ካርታ መጫወት፣ ቴሌቪዥን መመልከት የመሳሰሉትን አለታዊ ተግባራት ይመለከታል የእንቅስቃሴ ጊዜን ግን አይጨምርም፡፡ |                                                                                                                                                                       |                               |           |                    |
| ተ/ቁ                                                                                                                                                                                                                      | ጥያቄ                                                                                                                                                                   | ምላሽ/መልስ                       | ኮድ        | ማለፍ/ መዘለል          |
| 86                                                                                                                                                                                                                       | ሁነኛ በሚባል ቀን ለምን ያህል ሰአት ቁጭ ወይም ጋደም ይላሉ?                                                                                                                               | ሰአት-----<br>ደቂቃ-----          | P18 (a-b) |                    |
| <b>ሌሎች ባህሪያትን በተመለከተ</b>                                                                                                                                                                                                 |                                                                                                                                                                       |                               |           |                    |
| <b>ቁልፍ፣ የደም ግፊት በሽታን በተመለከተ</b>                                                                                                                                                                                          |                                                                                                                                                                       |                               |           |                    |
| ተ/ቁ                                                                                                                                                                                                                      | ጥያቄ                                                                                                                                                                   | ምላሽ/ መልስ                      | ኮድ        | ማለፍ/ መዘለል          |
| 87                                                                                                                                                                                                                       | የደም ግፊት መጠንዎን በጤና ሙያተኞች ተለክተው ያውቃሉ?                                                                                                                                   | አዎ-----1<br>የለም-----2         | H15       | የለም<br>→<br>ተ/ቁ 93 |

|  |  |  |  |  |
|--|--|--|--|--|
|  |  |  |  |  |
|--|--|--|--|--|

|    |                                                                            |                                                                                                       |      |                    |
|----|----------------------------------------------------------------------------|-------------------------------------------------------------------------------------------------------|------|--------------------|
| 88 | የደም ግፊት መጠንዎን ከፍ እንዳለ በጤና ሙያተኞች ተነግሮዎት ያውቃል?                               | አዎ-----1<br>የለም-----2                                                                                 | H16a | የለም<br>→<br>ተ/ቁ 93 |
| 89 | ባለፉት 12 ወራት የደም ግፊት መጠንዎ ከፍ ብሏል ተብለው ያውቃሉ?                                 | አዎ-----1<br>የለም-----2                                                                                 | H16b |                    |
| 90 | በለፉት ሁለት ሳምንታት በሀኪም የታዘዘ የደም ግፊት መድሀኒት ወስደዋል?                              | አዎ-----1<br>የለም-----2                                                                                 | H17  |                    |
| 91 | የደም ግፊት ችግርዎን በተመለከተ የባህል መድሀኒት አዋቂ ጋራ ራስዎን አሳይተው ነበር?                     | አዎ-----1<br>የለም-----2                                                                                 | H18  |                    |
| 92 | አሁን ባሉበት ሁኔታ የደም ግፊት ችግርዎን በተመለከተ ያስተካክላል ብለው የሚያምኑትን የባህል መድሀኒት እየወሰዱ ነው? | አዎ-----1<br>የለም-----2                                                                                 | H19  |                    |
| 93 | በቤተሰብዎ ውስጥ የደም ግፊት በሽታ ያለበት ሰው ነበር(አለ)?                                    | ቤተሰብ-----1<br>አባት-----2<br>እናት-----3<br>ወንድምና እህት-----4<br>ልጆች-----5<br>ማንም የለም-----6<br>አላውቅም-----88 | H20  |                    |

**ቁልፍ፤ የስኳር በሽታን በተመለከተ**

| ተ/ቁ | ጥያቄ                                                                              | ምላሽ/መልስ                                 | ኮድ  | ማለፍ/ መዘለል           |
|-----|----------------------------------------------------------------------------------|-----------------------------------------|-----|---------------------|
| 94  | በደምዎ ውስጥ ያለው የስኳር መጠን ተለክቶ ያውቃል?                                                 | አዎ-----1<br>የለም-----2                   | H21 | የለም<br>→<br>ተ/ቁ 100 |
| 95  | በደምዎ ውስጥ ያለው የስኳር መጠን በጤና ሙያተኞች ተለክቶ ከፍተኛ ነው ወይም የስኳር በሽታ አለበዎት ተብለው ያውቃሉ?       | አዎ-----1<br>የለም-----2                   | H22 | የለም →<br>ተ/ቁ 100    |
| 96  | ባለፉት 12 ወራት በደምዎ ውስጥ ያለው የስኳር መጠን ከፍተኛ ነው ወይም የስኳር በሽታ አለበዎት ተብሎ ተነግሮዎታል?        | አዎ-----1<br>የለም-----2<br>አላስታውስም-----88 | H23 |                     |
| 97  | በለፉት ሁለት ሳምንታት በጤና ሙያተኞች የታዘዘ የስኳር በሽታ መድሀኒት እየወሰዱ ቆይተዋል?                        | አዎ-----1<br>የለም-----2                   | H24 |                     |
| 98  | በደምዎ ውስጥ ያለው የስኳር መጠን በመጨመሩ ወይም የስኳር በሽታዎን አስመልክቶ ወደ ባህላዊ መድሀኒት አዋቂ ዘንድ ሄደው ነበር? | አዎ-----1<br>የለም-----2                   | H25 |                     |
| 99  | በአሁኑ ወቅት በደምዎ ውስጥ ያለው የስኳር መጠን በመጨመሩ ወይም የስኳር በሽታዎን ለማስታገስ የባህል መድሀኒት እየወሰዱ ነው?  | አዎ-----1<br>የለም-----2                   | H26 |                     |

|  |  |  |  |  |
|--|--|--|--|--|
|  |  |  |  |  |
|--|--|--|--|--|

|     |                                      |                                                                                                       |     |  |
|-----|--------------------------------------|-------------------------------------------------------------------------------------------------------|-----|--|
| 100 | በቤተሰብዎ ውስጥ የስኳር በሽታ ያለበት ሰው ነበር(አለ)? | ቤተሰብ-----1<br>አባት-----2<br>እናት-----3<br>ወንድምና እህት-----4<br>ልጆች-----5<br>ማንም የለም-----6<br>አላውቅም-----88 | H27 |  |
|-----|--------------------------------------|-------------------------------------------------------------------------------------------------------|-----|--|

**ቁልፍ፣ በደም ውስጥ የኮሌስትሮል መጠን መጨመርን በሚመለከት**

| ተ/ቁ | ጥያቄ                                                                                        | ምላሽ/መልስ                                                                                              | ኮድ  | ማለፍ/ መዝለል           |
|-----|--------------------------------------------------------------------------------------------|------------------------------------------------------------------------------------------------------|-----|---------------------|
| 101 | በደም ውስጥ ያለውን የኮሌስትሮል ቅባት መጠን በጤና ሙያተኛ ተለክተው ያውቃሉ?                                          | አዎ-----1<br>የለም-----2                                                                                | H28 | የለም<br>→<br>ተ/ቁ 107 |
| 102 | በጤና ሙያተኛ በደምዎ ውስጥ ያለው የኮሌስትሮል ቅባት መጠን ከፍተኛ ነው ተብለው ያውቃሉ?                                   | አዎ-----1<br>የለም-----2                                                                                | H29 | የለም<br>→<br>ተ/ቁ 107 |
| 103 | ባለፉት 12 ወራት በጤና ሙያተኛ በደምዎ ውስጥ ያለው የኮሌስትሮል ቅባት መጠን ከፍተኛ ነው ተብለዋል?                           | አዎ-----1<br>የለም-----2                                                                                | H30 |                     |
| 104 | ባለፉት ሁለት ሳምንታት በጤና ሙያተኛ በደምዎ ውስጥ ያለውን ከፍተኛ የኮሌስትሮል ቅባት መጠን የሚያስተካክል በአፍ የሚወሰድ መድሃኒት ወስደዋል? | አዎ-----1<br>የለም-----2                                                                                | H31 |                     |
| 105 | በደምዎ ውስጥ ያለውን ከፍተኛ የኮሌስትሮል ቅባት መጠን ተከትሎ የባህላዊ መድሃኒት አዋቂ ዘንድ ሄደው ነበር?                       | አዎ-----1<br>የለም-----2                                                                                | H32 |                     |
| 106 | በአሁኑ ወቅት በደምዎ ውስጥ ያለውን ከፍተኛ የኮሌስትሮል ቅባት መጠን ተከትሎ የባህላዊ መድሃኒት የሚወስዱት አለ?                    | አዎ-----1<br>የለም-----2                                                                                | H33 |                     |
| 107 | በቤተሰብዎ ውስጥ ከፍተኛ የኮሌስትሮል ቅባት መጠን ያለበት ሰው ነበር(አለ)?                                           | ቤተሰብ-----1<br>አባት-----2<br>እናት-----3<br>ወንድምና እህት-----4<br>ልጆች-----5<br>ማንም የለ-----6<br>አላውቅም-----88 | H34 |                     |

**ከፍል ሁለት፣ አካላዊ ልኬቶች**

| ቁልፍ፣ የደም ግፊት መጠን |                        |         |    |           |
|------------------|------------------------|---------|----|-----------|
| ተ/ቁ              | ጥያቄ                    | ምላሽ/መልስ | ኮድ | ማለፍ/ መዝለል |
| 108              | የጠያቂው ስምና መለያ ቁጥር      | -----   | M1 |           |
| 109              | የደም ግፊት መለኪያ መሣሪያው ቁጥር | -----   | M2 |           |

|  |  |  |  |  |  |
|--|--|--|--|--|--|
|  |  |  |  |  |  |
|--|--|--|--|--|--|

|                                             |                                                                         |                                                         |            |  |
|---------------------------------------------|-------------------------------------------------------------------------|---------------------------------------------------------|------------|--|
| 110                                         | የተጠቀሙበት ካፍ/cuff/ መጠን                                                    | ትንሹ-----1<br>መጠነኛ-----2<br>ትልቁ-----3                    | M3         |  |
| 111                                         | ንባብ 1                                                                   | ሲስቶሊክ-----<br>ሚሊ ሜትር ሜረኩሪ<br>ዲያስቶሊክ-----<br>ሚሊ ሜትር ሜረኩሪ | M4a<br>M4b |  |
| 112                                         | ንባብ 2                                                                   | ሲስቶሊክ-----<br>ሚሊ ሜትር ሜረኩሪ<br>ዲያስቶሊክ-----<br>ሚሊ ሜትር ሜረኩሪ | M5a<br>M5b |  |
| 113                                         | ንባብ 3                                                                   | ሲስቶሊክ-----<br>ሚሊ ሜትር ሜረኩሪ<br>ዲያስቶሊክ-----<br>ሚሊ ሜትር ሜረኩሪ | M6a<br>M6b |  |
| 114                                         | ባለፉት ሁለት ሳምንታት የደም ግፊት መጠንዎ ስለ ጨመረ ከሃኪም የደም ግፊት መድሃኒት እንዲወስዱ ተመክረው ነበር? | አዎ-----1<br>የለም-----2                                   | M7         |  |
| <b>ቁልፍ፤ ቁመትናክብደት</b>                        |                                                                         |                                                         |            |  |
| 115                                         | የጠያቂው መለያ ቁጥር                                                           | -----                                                   | M8         |  |
| 116                                         | የቁመት እና ክብደት መጠንን ለመለካት የተጠቀሙበት መሣሪያ ቁጥር                                | የቁመት-----<br>የክብደት-----                                 | M9         |  |
| 117                                         | ቁመት                                                                     | -----ሴ.ሜ                                                | M10        |  |
| 118                                         | ክብደት የክብደት መጠናቸው ከልኬት በላይ ከሆን 666.6 ብለው ይመዘገቡ                           | -----ኪ.ግ                                                | M11        |  |
| <b>ቁልፍ ፤ የወገብ ዙሪያ ልኬት</b>                   |                                                                         |                                                         |            |  |
| 119                                         | የወገብ ዙሪያ ለመለካት የተቀሙበት መሣሪያ መለያ ቁጥር                                      | -----                                                   | M12        |  |
| 120                                         | የወገብ ዙሪያ ልኬት                                                            | -----ሴ.ሜ                                                | M13        |  |
| <b>የተባራራ ምላሽ፤ የዳሌ ዙሪያ ልኬት እና የልብ ምት መጠን</b> |                                                                         |                                                         |            |  |
| 121                                         | የዳሌ ዙሪያ ልኬት                                                             | -----ሴ.ሜ                                                | M14        |  |
| 122                                         | የልብ ምት መጠን                                                              |                                                         |            |  |
|                                             | ንባብ1                                                                    | -----በደቂቃ                                               | M15a       |  |
|                                             | ንባብ2                                                                    | -----በደቂቃ                                               | M15b       |  |
|                                             | ንባብ 3                                                                   | -----በደቂቃ                                               | M15c       |  |
| <b>ክፍል 3፤ በደም ውስጥ ያሉ ማዕድናት/ ኬሚካል መጠን</b>    |                                                                         |                                                         |            |  |
| <b>ቁልፍ፤ በደም ውስጥ ያለ የስኳር መጠን</b>             |                                                                         |                                                         |            |  |

|  |  |  |  |  |  |
|--|--|--|--|--|--|
|  |  |  |  |  |  |
|--|--|--|--|--|--|

|                                                                |                                                                                           |                               |     |  |
|----------------------------------------------------------------|-------------------------------------------------------------------------------------------|-------------------------------|-----|--|
| 123                                                            | ባለፉት 12 ሰዓታት ውሃን ሳይጨምር የበሉት ወይም የጠጡት ነገር አለ?                                              | አዎ-----1<br>የለም-----2         | B1  |  |
| 124                                                            | የቴክኒክ ባለሙያው መለያ ቁጥር                                                                       | -----                         | B2  |  |
| 125                                                            | የተጠቀሙበት መሣሪያ መለያ ቁጥር                                                                      | -----                         | B3  |  |
| 126                                                            | ደም የወሰዱበት ዕለታዊ ሰዓት                                                                        | ሰአት-----ደቂቃ-----              | B4  |  |
| 127                                                            | ምግብ ሳይመገቡ በፊት በደም ውስጥ የነበረው የስኳር መጠን<br>(በሚሊሞል ወይም በ ሚ.ግ/ደ.ሊ.)                            | -----ሚሊሞል/ሊ.<br>-----ሚ.ግ/ደ.ሊ. | B5  |  |
| 128                                                            | በዛሬው ዕለት የደም ውስጥ የስኳር መጠንዎ ከፍ ከማለቱ ጋር በተያያዘ በሃኪም የታዘዙለዎትን ኢንሱሊን ወይም ሌላ መድሃኒት ወስደዋል?       | አዎ-----1<br>የለም-----2         | B6  |  |
| <b>ቁልፍ፤ በደም ውስጥ ያለውን የቅባት መጠን</b>                              |                                                                                           |                               |     |  |
| 129                                                            | የመለኪያ መሣሪያው መለያ ቁጥር                                                                       | -----                         | B7  |  |
| 130                                                            | የተሳታፊው መለያ ቁጥር                                                                            | -----                         | B8  |  |
| 131                                                            | የተሳታፊው መኖሪያ ቦታ                                                                            | ክፍለ ከተማ-----<br>ወረዳ-----      | B9  |  |
| 132                                                            | የናሙናው መለያ ቁጥር                                                                             | -----                         | B10 |  |
| 133                                                            | በደም ውስጥ ያለው አጠቃላይ የኮሌስትሮል መጠን (በሚሊሞል ወይም በ ሚ.ግ/ደ.ሊ.)                                      | -----ሚሊሞል/ሊ.<br>-----ሚ.ግ/ደ.ሊ. | B11 |  |
| 134                                                            | ባለፉት ሁለት ሳምንታት ውስጥ በደም ውስጥ ያለው የኮሌስትሮል ቅባት መጠን በመጨመሩ ምክንያት በሃኪም የታዘዙለዎት መድሃኒቶች ተጠቅመው ነበር? | አዎ-----1<br>የለም-----2         | B12 |  |
| <b>የተባራራ ምላሽ፤ ትራይግላይሴራይድ እና ከፍተኛ ዴንሲቲ ያለው የኮሌስትሮል ቅባት ልኬቶች</b> |                                                                                           |                               |     |  |
| 135                                                            | የትራይግላይሴራይድ መጠን<br>(በሚሊሞል ወይም በ ሚ.ግ/ደ.ሊ.)                                                 | -----ሚሊሞል/ሊ.<br>-----ሚ.ግ/ደ.ሊ. | B13 |  |
| 136                                                            | ከፍተኛ ዴንሲቲ ያለው የኮሌስትሮል ቅባት መጠን (በሚሊሞል ወይም በ ሚ.ግ/ደ.ሊ.)                                      | -----ሚሊሞል/ሊ.<br>-----ሚ.ግ/ደ.ሊ. | B14 |  |
